# Supplementary material for: The impacts of increased global vaccine sharing on the COVID-19 pandemic; a retrospective modelling study
Source: bioRxiv or medRxiv preprint supplement (doi:10.1101/2022.01.26.22269877), 2022-01-27
Supplement: Supplementary file [file media-1.pdf]

# Supplementary Information, full results table: The impacts of increased global vaccine sharing on the COVID-19 pandemic; a retrospective modelling study

Sam Moore, Edward M. Hill, Louise Dyson, Michael J. Tildesley, Matt J. Keeling

| Country              | Income bracket      | Strategy         | Proportion vaccinated | Proportion infected |                  | Mortalities per 100,000 |               |
|----------------------|---------------------|------------------|-----------------------|---------------------|------------------|-------------------------|---------------|
|                      |                     |                  |                       | unchanged           | adapted          | unchanged               | adapted       |
| Afghanistan          | Low income          | Default          | 0.03                  | 0.95 (0.90,0.97)    | 0.95 (0.90,0.97) | 312 (167,489)           | 312 (167,489) |
| Afghanistan          | Low income          | 2 dose threshold | 0.12                  | 0.95 (0.90,0.97)    | 0.95 (0.90,0.97) | 312 (167,488)           | 312 (167,488) |
| Afghanistan          | Low income          | 40+ threshold    | 0.27                  | 0.95 (0.90,0.96)    | 0.95 (0.90,0.96) | 303 (162,471)           | 303 (162,471) |
| Afghanistan          | Low income          | 65+ threshold    | 0.39                  | 0.93 (0.89,0.96)    | 0.83 (0.61,0.93) | 236 (139,369)           | 216 (134,341) |
| Afghanistan          | Low income          | Full sharing     | 0.41                  | 0.92 (0.86,0.95)    | 0.36 (0.30,0.42) | 185 (112,281)           | 103 (70,142)  |
| Angola               | Lower middle income | Default          | 0.04                  | 0.76 (0.64,0.84)    | 0.76 (0.64,0.84) | 109 (64,168)            | 109 (64,168)  |
| Angola               | Lower middle income | 2 dose threshold | 0.13                  | 0.76 (0.64,0.84)    | 0.76 (0.64,0.84) | 109 (64,167)            | 109 (64,167)  |
| Angola               | Lower middle income | 40+ threshold    | 0.26                  | 0.76 (0.62,0.84)    | 0.76 (0.62,0.84) | 105 (61,163)            | 106 (61,163)  |
| Angola               | Lower middle income | 65+ threshold    | 0.36                  | 0.73 (0.56,0.83)    | 0.59 (0.38,0.78) | 82 (48,128)             | 72 (40,122)   |
| Angola               | Lower middle income | Full sharing     | 0.38                  | 0.67 (0.49,0.79)    | 0.20 (0.14,0.25) | 60 (38,90)              | 23 (17,28)    |
| Albania              | Upper middle income | Default          | 0.28                  | 0.84 (0.79,0.87)    | 0.84 (0.79,0.87) | 343 (225,510)           | 343 (225,510) |
| Albania              | Upper middle income | 2 dose threshold | 0.38                  | 0.84 (0.79,0.87)    | 0.84 (0.79,0.87) | 343 (225,510)           | 343 (225,510) |
| Albania              | Upper middle income | 40+ threshold    | 0.52                  | 0.83 (0.79,0.86)    | 0.83 (0.79,0.86) | 342 (225,509)           | 342 (225,509) |
| Albania              | Upper middle income | 65+ threshold    | 0.55                  | 0.83 (0.79,0.86)    | 0.81 (0.77,0.85) | 341 (224,506)           | 340 (224,506) |
| Albania              | Upper middle income | Full sharing     | 0.52                  | 0.83 (0.79,0.86)    | 0.49 (0.40,0.55) | 321 (212,476)           | 198 (145,259) |
| United Arab Emirates | High income         | Default          | 1.06                  | 0.45 (0.34,0.55)    | 0.45 (0.34,0.55) | 60 (38,85)              | 60 (38,85)    |
| United Arab Emirates | High income         | 2 dose threshold | 0.99                  | 0.45 (0.34,0.55)    | 0.45 (0.34,0.55) | 60 (38,85)              | 60 (38,85)    |
| United Arab Emirates | High income         | 40+ threshold    | 0.50                  | 0.75 (0.72,0.78)    | 0.53 (0.37,0.61) | 99 (54,158)             | 71 (40,111)   |
| United Arab Emirates | High income         | 65+ threshold    | 0.55                  | 0.77 (0.74,0.79)    | 0.53 (0.43,0.61) | 128 (65,211)            | 92 (50,143)   |
| United Arab Emirates | High income         | Full sharing     | 0.55                  | 0.75 (0.71,0.76)    | 0.15 (0.12,0.17) | 165 (84,272)            | 36 (24,52)    |
| Argentina            | Upper middle income | Default          | 0.57                  | 0.86 (0.80,0.89)    | 0.86 (0.80,0.89) | 303 (247,367)           | 303 (247,367) |
| Argentina            | Upper middle income | 2 dose threshold | 0.63                  | 0.86 (0.80,0.89)    | 0.86 (0.80,0.89) | 303 (247,367)           | 303 (247,367) |
| Argentina            | Upper middle income | 40+ threshold    | 0.53                  | 0.86 (0.80,0.89)    | 0.86 (0.80,0.89) | 302 (245,365)           | 302 (245,366) |
| Argentina            | Upper middle income | 65+ threshold    | 0.51                  | 0.85 (0.79,0.89)    | 0.80 (0.66,0.89) | 293 (239,352)           | 285 (230,351) |
| Argentina            | Upper middle income | Full sharing     | 0.49                  | 0.86 (0.79,0.89)    | 0.31 (0.27,0.35) | 299 (244,362)           | 130 (114,148) |
| Armenia              | Upper middle income | Default          | 0.03                  | 0.90 (0.85,0.94)    | 0.90 (0.85,0.94) | 390 (262,558)           | 390 (262,558) |

| Country      | Income bracket      | Strategy         | Proportion vaccinated | Proportion infected |                  | Mortalities per 100,000 |               |
|--------------|---------------------|------------------|-----------------------|---------------------|------------------|-------------------------|---------------|
|              |                     |                  |                       | unchanged           | adapted          | unchanged               | adapted       |
| Armenia      | Upper middle income | 2 dose threshold | 0.14                  | 0.90 (0.85,0.94)    | 0.90 (0.85,0.94) | 390 (262,557)           | 390 (262,557) |
| Armenia      | Upper middle income | 40+ threshold    | 0.33                  | 0.90 (0.85,0.94)    | 0.90 (0.85,0.94) | 386 (260,550)           | 386 (260,551) |
| Armenia      | Upper middle income | 65+ threshold    | 0.48                  | 0.89 (0.84,0.94)    | 0.89 (0.83,0.94) | 364 (239,519)           | 363 (238,518) |
| Armenia      | Upper middle income | Full sharing     | 0.51                  | 0.88 (0.83,0.93)    | 0.62 (0.59,0.66) | 313 (210,451)           | 244 (174,339) |
| Australia    | High income         | Default          | 0.35                  | 0.07 (0.01,0.18)    | 0.07 (0.01,0.18) | 27 (12,54)              | 27 (12,54)    |
| Australia    | High income         | 2 dose threshold | 0.45                  | 0.06 (0.01,0.18)    | 0.06 (0.01,0.18) | 26 (12,54)              | 26 (12,54)    |
| Australia    | High income         | 40+ threshold    | 0.56                  | 0.06 (0.01,0.17)    | 0.06 (0.01,0.17) | 24 (12,47)              | 24 (12,47)    |
| Australia    | High income         | 65+ threshold    | 0.53                  | 0.05 (0.01,0.13)    | 0.01 (0.01,0.02) | 18 (10,31)              | 12 (9,18)     |
| Australia    | High income         | Full sharing     | 0.51                  | 0.05 (0.01,0.14)    | 0.01 (0.01,0.01) | 18 (9,33)               | 7 (6,8)       |
| Austria      | High income         | Default          | 0.80                  | 0.46 (0.33,0.54)    | 0.46 (0.33,0.54) | 251 (181,320)           | 251 (181,320) |
| Austria      | High income         | 2 dose threshold | 0.84                  | 0.46 (0.33,0.54)    | 0.46 (0.33,0.54) | 251 (181,320)           | 251 (181,320) |
| Austria      | High income         | 40+ threshold    | 0.73                  | 0.46 (0.33,0.54)    | 0.46 (0.32,0.54) | 250 (181,320)           | 250 (181,320) |
| Austria      | High income         | 65+ threshold    | 0.60                  | 0.48 (0.35,0.54)    | 0.40 (0.28,0.51) | 252 (186,316)           | 241 (176,310) |
| Austria      | High income         | Full sharing     | 0.53                  | 0.50 (0.37,0.56)    | 0.16 (0.14,0.19) | 305 (216,404)           | 118 (96,134)  |
| Azerbaijan   | Upper middle income | Default          | 0.34                  | 0.85 (0.80,0.89)    | 0.85 (0.80,0.89) | 269 (174,387)           | 269 (174,387) |
| Azerbaijan   | Upper middle income | 2 dose threshold | 0.42                  | 0.85 (0.80,0.89)    | 0.85 (0.80,0.89) | 269 (174,387)           | 269 (174,387) |
| Azerbaijan   | Upper middle income | 40+ threshold    | 0.50                  | 0.84 (0.80,0.89)    | 0.84 (0.80,0.89) | 268 (174,386)           | 268 (174,386) |
| Azerbaijan   | Upper middle income | 65+ threshold    | 0.49                  | 0.84 (0.80,0.89)    | 0.81 (0.72,0.89) | 265 (171,380)           | 261 (171,368) |
| Azerbaijan   | Upper middle income | Full sharing     | 0.50                  | 0.84 (0.80,0.89)    | 0.50 (0.45,0.58) | 256 (170,366)           | 161 (118,207) |
| Belgium      | High income         | Default          | 0.95                  | 0.58 (0.45,0.64)    | 0.58 (0.45,0.64) | 526 (408,677)           | 526 (408,677) |
| Belgium      | High income         | 2 dose threshold | 0.94                  | 0.58 (0.45,0.64)    | 0.58 (0.45,0.64) | 526 (408,677)           | 526 (408,677) |
| Belgium      | High income         | 40+ threshold    | 0.71                  | 0.58 (0.45,0.64)    | 0.58 (0.45,0.64) | 525 (407,675)           | 525 (407,676) |
| Belgium      | High income         | 65+ threshold    | 0.58                  | 0.59 (0.46,0.64)    | 0.51 (0.37,0.63) | 525 (408,669)           | 510 (396,658) |
| Belgium      | High income         | Full sharing     | 0.52                  | 0.60 (0.47,0.66)    | 0.22 (0.20,0.26) | 622 (483,815)           | 268 (227,317) |
| Benin        | Lower middle income | Default          | 0.00                  | 0.52 (0.31,0.66)    | 0.52 (0.31,0.66) | 86 (50,129)             | 86 (50,129)   |
| Benin        | Lower middle income | 2 dose threshold | 0.10                  | 0.52 (0.31,0.66)    | 0.52 (0.31,0.66) | 86 (50,129)             | 86 (50,129)   |
| Benin        | Lower middle income | 40+ threshold    | 0.25                  | 0.51 (0.30,0.65)    | 0.51 (0.30,0.65) | 73 (43,112)             | 73 (43,112)   |
| Benin        | Lower middle income | 65+ threshold    | 0.38                  | 0.38 (0.20,0.49)    | 0.25 (0.14,0.35) | 42 (27,63)              | 38 (25,58)    |
| Benin        | Lower middle income | Full sharing     | 0.41                  | 0.30 (0.16,0.40)    | 0.07 (0.05,0.10) | 33 (22,48)              | 10 (7,13)     |
| Burkina Faso | Low income          | Default          | 0.00                  | 0.69 (0.55,0.78)    | 0.69 (0.55,0.78) | 47 (27,75)              | 47 (27,75)    |
| Burkina Faso | Low income          | 2 dose threshold | 0.10                  | 0.68 (0.55,0.77)    | 0.68 (0.55,0.77) | 46 (26,75)              | 46 (26,75)    |
| Burkina Faso | Low income          | 40+ threshold    | 0.25                  | 0.65 (0.53,0.74)    | 0.65 (0.53,0.74) | 43 (25,72)              | 43 (25,72)    |
| Burkina Faso | Low income          | 65+ threshold    | 0.37                  | 0.61 (0.49,0.72)    | 0.60 (0.48,0.72) | 40 (23,67)              | 40 (23,67)    |
| Burkina Faso | Low income          | Full sharing     | 0.39                  | 0.60 (0.48,0.71)    | 0.34 (0.22,0.44) | 36 (21,60)              | 18 (13,25)    |
| Bangladesh   | Lower middle income | Default          | 0.05                  | 0.81 (0.76,0.85)    | 0.81 (0.76,0.85) | 93 (53,142)             | 93 (53,142)   |

| Country                | Income bracket      | Strategy         | Proportion vaccinated | Proportion infected |                  | Mortalities per 100,000 |                 |
|------------------------|---------------------|------------------|-----------------------|---------------------|------------------|-------------------------|-----------------|
|                        |                     |                  |                       | unchanged           | adapted          | unchanged               | adapted         |
| Bangladesh             | Lower middle income | 2 dose threshold | 0.16                  | 0.81 (0.76,0.85)    | 0.81 (0.76,0.85) | 93 (52,142)             | 93 (52,142)     |
| Bangladesh             | Lower middle income | 40+ threshold    | 0.34                  | 0.80 (0.76,0.85)    | 0.80 (0.76,0.84) | 92 (52,139)             | 92 (52,139)     |
| Bangladesh             | Lower middle income | 65+ threshold    | 0.48                  | 0.79 (0.75,0.83)    | 0.72 (0.57,0.82) | 86 (48,129)             | 82 (45,127)     |
| Bangladesh             | Lower middle income | Full sharing     | 0.49                  | 0.79 (0.75,0.83)    | 0.36 (0.26,0.45) | 76 (44,113)             | 43 (30,55)      |
| Bulgaria               | Upper middle income | Default          | 0.19                  | 0.83 (0.78,0.85)    | 0.83 (0.78,0.85) | 371 (246,556)           | 371 (246,556)   |
| Bulgaria               | Upper middle income | 2 dose threshold | 0.30                  | 0.83 (0.78,0.85)    | 0.83 (0.78,0.85) | 371 (246,556)           | 371 (246,556)   |
| Bulgaria               | Upper middle income | 40+ threshold    | 0.47                  | 0.82 (0.77,0.85)    | 0.82 (0.77,0.85) | 370 (245,554)           | 370 (245,555)   |
| Bulgaria               | Upper middle income | 65+ threshold    | 0.56                  | 0.82 (0.77,0.85)    | 0.80 (0.73,0.85) | 365 (242,546)           | 364 (240,545)   |
| Bulgaria               | Upper middle income | Full sharing     | 0.53                  | 0.82 (0.77,0.85)    | 0.41 (0.32,0.49) | 358 (238,536)           | 227 (172,297)   |
| Bahrain                | High income         | Default          | 0.94                  | 0.80 (0.69,0.86)    | 0.80 (0.69,0.86) | 125 (83,167)            | 125 (83,167)    |
| Bahrain                | High income         | 2 dose threshold | 0.93                  | 0.80 (0.69,0.86)    | 0.80 (0.69,0.86) | 125 (83,167)            | 125 (83,167)    |
| Bahrain                | High income         | 40+ threshold    | 0.50                  | 0.82 (0.74,0.87)    | 0.56 (0.49,0.66) | 129 (87,174)            | 97 (66,129)     |
| Bahrain                | High income         | 65+ threshold    | 0.52                  | 0.90 (0.85,0.92)    | 0.67 (0.57,0.73) | 221 (142,305)           | 147 (93,208)    |
| Bahrain                | High income         | Full sharing     | 0.54                  | 0.88 (0.82,0.91)    | 0.26 (0.23,0.29) | 189 (125,260)           | 63 (44,82)      |
| Bosnia and Herzegovina | Upper middle income | Default          | 0.13                  | 0.84 (0.81,0.87)    | 0.84 (0.81,0.87) | 306 (240,422)           | 306 (240,422)   |
| Bosnia and Herzegovina | Upper middle income | 2 dose threshold | 0.24                  | 0.84 (0.81,0.87)    | 0.84 (0.81,0.87) | 306 (240,422)           | 306 (240,422)   |
| Bosnia and Herzegovina | Upper middle income | 40+ threshold    | 0.43                  | 0.84 (0.81,0.87)    | 0.84 (0.81,0.87) | 304 (238,419)           | 304 (238,420)   |
| Bosnia and Herzegovina | Upper middle income | 65+ threshold    | 0.52                  | 0.84 (0.80,0.87)    | 0.82 (0.75,0.87) | 295 (227,405)           | 294 (225,404)   |
| Bosnia and Herzegovina | Upper middle income | Full sharing     | 0.54                  | 0.83 (0.79,0.87)    | 0.50 (0.43,0.55) | 271 (210,365)           | 189 (162,229)   |
| Belarus                | Upper middle income | Default          | 0.15                  | 0.79 (0.73,0.84)    | 0.79 (0.73,0.84) | 534 (315,885)           | 534 (315,885)   |
| Belarus                | Upper middle income | 2 dose threshold | 0.25                  | 0.79 (0.73,0.84)    | 0.79 (0.73,0.84) | 534 (315,885)           | 534 (315,885)   |
| Belarus                | Upper middle income | 40+ threshold    | 0.44                  | 0.79 (0.73,0.84)    | 0.79 (0.73,0.84) | 525 (312,868)           | 525 (312,869)   |
| Belarus                | Upper middle income | 65+ threshold    | 0.51                  | 0.77 (0.70,0.83)    | 0.76 (0.67,0.83) | 460 (282,727)           | 456 (282,724)   |
| Belarus                | Upper middle income | Full sharing     | 0.52                  | 0.76 (0.68,0.82)    | 0.27 (0.18,0.36) | 411 (254,637)           | 168 (124,212)   |
| Bolivia                | Lower middle income | Default          | 0.25                  | 0.88 (0.85,0.90)    | 0.88 (0.85,0.90) | 1025 (628,1471)         | 1025 (628,1471) |
| Bolivia                | Lower middle income | 2 dose threshold | 0.34                  | 0.88 (0.85,0.90)    | 0.88 (0.85,0.90) | 1025 (628,1470)         | 1025 (628,1470) |
| Bolivia                | Lower middle income | 40+ threshold    | 0.42                  | 0.88 (0.85,0.89)    | 0.88 (0.85,0.90) | 1015 (620,1455)         | 1015 (620,1456) |
| Bolivia                | Lower middle income | 65+ threshold    | 0.45                  | 0.87 (0.84,0.89)    | 0.85 (0.79,0.88) | 952 (564,1390)          | 944 (559,1378)  |
| Bolivia                | Lower middle income | Full sharing     | 0.47                  | 0.86 (0.83,0.88)    | 0.58 (0.53,0.62) | 805 (487,1169)          | 504 (307,679)   |
| Brazil                 | Upper middle income | Default          | 0.54                  | 0.82 (0.78,0.84)    | 0.82 (0.78,0.84) | 245 (206,291)           | 245 (206,291)   |
| Brazil                 | Upper middle income | 2 dose threshold | 0.61                  | 0.82 (0.78,0.84)    | 0.82 (0.78,0.84) | 245 (206,291)           | 245 (206,291)   |
| Brazil                 | Upper middle income | 40+ threshold    | 0.55                  | 0.82 (0.78,0.84)    | 0.82 (0.78,0.84) | 245 (205,290)           | 245 (206,290)   |
| Brazil                 | Upper middle income | 65+ threshold    | 0.52                  | 0.82 (0.78,0.84)    | 0.72 (0.63,0.80) | 242 (204,287)           | 231 (190,279)   |
| Brazil                 | Upper middle income | Full sharing     | 0.51                  | 0.82 (0.77,0.84)    | 0.35 (0.32,0.39) | 239 (202,283)           | 115 (105,127)   |
| Barbados               | High income         | Default          | 0.48                  | 0.51 (0.36,0.62)    | 0.51 (0.36,0.62) | 76 (62,96)              | 76 (62,96)      |

| Country                          | Income bracket      | Strategy         | Proportion vaccinated | Proportion infected |                  | Mortalities per 100,000 |                |
|----------------------------------|---------------------|------------------|-----------------------|---------------------|------------------|-------------------------|----------------|
|                                  |                     |                  |                       | unchanged           | adapted          | unchanged               | adapted        |
| Barbados                         | High income         | 2 dose threshold | 0.56                  | 0.50 (0.36,0.62)    | 0.50 (0.36,0.62) | 76 (62,96)              | 76 (62,96)     |
| Barbados                         | High income         | 40+ threshold    | 0.64                  | 0.47 (0.32,0.60)    | 0.47 (0.31,0.60) | 74 (61,93)              | 74 (61,93)     |
| Barbados                         | High income         | 65+ threshold    | 0.58                  | 0.53 (0.39,0.65)    | 0.19 (0.14,0.24) | 83 (68,104)             | 59 (43,85)     |
| Barbados                         | High income         | Full sharing     | 0.53                  | 0.59 (0.45,0.70)    | 0.13 (0.10,0.22) | 102 (82,130)            | 40 (23,88)     |
| Central African Republic         | Low income          | Default          | 0.02                  | 0.84 (0.72,0.90)    | 0.84 (0.72,0.90) | 226 (124,338)           | 226 (124,338)  |
| Central African Republic         | Low income          | 2 dose threshold | 0.11                  | 0.84 (0.72,0.90)    | 0.84 (0.72,0.90) | 226 (124,338)           | 226 (124,338)  |
| Central African Republic         | Low income          | 40+ threshold    | 0.26                  | 0.83 (0.72,0.90)    | 0.84 (0.72,0.90) | 221 (121,330)           | 222 (121,330)  |
| Central African Republic         | Low income          | 65+ threshold    | 0.38                  | 0.83 (0.70,0.90)    | 0.83 (0.70,0.90) | 194 (105,293)           | 194 (105,291)  |
| Central African Republic         | Low income          | Full sharing     | 0.40                  | 0.80 (0.66,0.89)    | 0.39 (0.29,0.49) | 141 (81,207)            | 72 (52,95)     |
| Canada                           | High income         | Default          | 1.02                  | 0.53 (0.29,0.65)    | 0.53 (0.29,0.65) | 188 (130,275)           | 188 (130,275)  |
| Canada                           | High income         | 2 dose threshold | 0.97                  | 0.53 (0.29,0.65)    | 0.53 (0.29,0.65) | 188 (130,274)           | 188 (130,274)  |
| Canada                           | High income         | 40+ threshold    | 0.71                  | 0.53 (0.29,0.65)    | 0.53 (0.29,0.65) | 187 (129,273)           | 187 (129,273)  |
| Canada                           | High income         | 65+ threshold    | 0.57                  | 0.57 (0.34,0.66)    | 0.39 (0.21,0.55) | 194 (136,279)           | 173 (122,245)  |
| Canada                           | High income         | Full sharing     | 0.53                  | 0.59 (0.35,0.68)    | 0.14 (0.09,0.18) | 231 (157,356)           | 74 (59,88)     |
| Switzerland                      | High income         | Default          | 0.75                  | 0.48 (0.39,0.55)    | 0.48 (0.39,0.55) | 579 (232,1517)          | 579 (232,1517) |
| Switzerland                      | High income         | 2 dose threshold | 0.80                  | 0.48 (0.39,0.55)    | 0.48 (0.39,0.55) | 579 (232,1517)          | 579 (232,1517) |
| Switzerland                      | High income         | 40+ threshold    | 0.71                  | 0.48 (0.39,0.55)    | 0.48 (0.39,0.55) | 576 (231,1509)          | 577 (231,1512) |
| Switzerland                      | High income         | 65+ threshold    | 0.58                  | 0.49 (0.40,0.55)    | 0.38 (0.30,0.47) | 571 (231,1468)          | 528 (217,1318) |
| Switzerland                      | High income         | Full sharing     | 0.53                  | 0.51 (0.42,0.58)    | 0.17 (0.14,0.21) | 703 (269,1924)          | 197 (126,304)  |
| Chile                            | High income         | Default          | 1.02                  | 0.64 (0.50,0.71)    | 0.64 (0.50,0.71) | 263 (224,300)           | 263 (224,300)  |
| Chile                            | High income         | 2 dose threshold | 0.91                  | 0.64 (0.50,0.71)    | 0.64 (0.50,0.71) | 263 (224,300)           | 263 (224,300)  |
| Chile                            | High income         | 40+ threshold    | 0.63                  | 0.69 (0.59,0.74)    | 0.50 (0.35,0.66) | 268 (232,301)           | 251 (212,295)  |
| Chile                            | High income         | 65+ threshold    | 0.55                  | 0.83 (0.78,0.85)    | 0.41 (0.34,0.49) | 314 (274,345)           | 243 (211,283)  |
| Chile                            | High income         | Full sharing     | 0.52                  | 0.84 (0.79,0.87)    | 0.18 (0.16,0.20) | 352 (305,394)           | 104 (100,109)  |
| China                            | Upper middle income | Default          | 1.03                  | 0.00 (0.00,0.00)    | 0.00 (0.00,0.00) | 1 (1,1)                 | 1 (1,1)        |
| China                            | Upper middle income | 2 dose threshold | 0.93                  | 0.00 (0.00,0.00)    | 0.00 (0.00,0.00) | 1 (1,1)                 | 1 (1,1)        |
| China                            | Upper middle income | 40+ threshold    | 0.67                  | 0.00 (0.00,0.00)    | 0.00 (0.00,0.00) | 1 (1,1)                 | 1 (1,1)        |
| China                            | Upper middle income | 65+ threshold    | 0.53                  | 0.00 (0.00,0.00)    | 0.00 (0.00,0.00) | 1 (1,1)                 | 1 (1,1)        |
| China                            | Upper middle income | Full sharing     | 0.53                  | 0.00 (0.00,0.00)    | 0.00 (0.00,0.00) | 1 (1,1)                 | 0 (0,0)        |
| Cameroon                         | Lower middle income | Default          | 0.01                  | 0.71 (0.60,0.77)    | 0.71 (0.60,0.77) | 82 (39,135)             | 82 (39,135)    |
| Cameroon                         | Lower middle income | 2 dose threshold | 0.11                  | 0.71 (0.60,0.77)    | 0.71 (0.60,0.77) | 82 (39,135)             | 82 (39,135)    |
| Cameroon                         | Lower middle income | 40+ threshold    | 0.26                  | 0.70 (0.59,0.77)    | 0.70 (0.59,0.77) | 79 (38,132)             | 79 (38,132)    |
| Cameroon                         | Lower middle income | 65+ threshold    | 0.39                  | 0.68 (0.54,0.76)    | 0.66 (0.50,0.77) | 67 (30,115)             | 66 (30,115)    |
| Cameroon                         | Lower middle income | Full sharing     | 0.41                  | 0.64 (0.49,0.73)    | 0.25 (0.19,0.35) | 51 (25,83)              | 23 (16,29)     |
| Democratic Republic of the Congo | Low income          | Default          | 0.00                  | 0.72 (0.55,0.80)    | 0.72 (0.55,0.80) | 102 (65,158)            | 102 (65,158)   |

| Country                          | Income bracket      | Strategy         | Proportion vaccinated | Proportion infected |                  | Mortalities per 100,000 |               |
|----------------------------------|---------------------|------------------|-----------------------|---------------------|------------------|-------------------------|---------------|
|                                  |                     |                  |                       | unchanged           | adapted          | unchanged               | adapted       |
| Democratic Republic of the Congo | Low income          | 2 dose threshold | 0.09                  | 0.72 (0.55,0.80)    | 0.72 (0.55,0.80) | 101 (65,158)            | 101 (65,158)  |
| Democratic Republic of the Congo | Low income          | 40+ threshold    | 0.24                  | 0.71 (0.55,0.80)    | 0.71 (0.54,0.80) | 92 (59,142)             | 92 (59,142)   |
| Democratic Republic of the Congo | Low income          | 65+ threshold    | 0.36                  | 0.64 (0.44,0.75)    | 0.44 (0.31,0.55) | 61 (40,88)              | 54 (36,75)    |
| Democratic Republic of the Congo | Low income          | Full sharing     | 0.38                  | 0.56 (0.36,0.69)    | 0.21 (0.16,0.26) | 50 (34,69)              | 22 (16,29)    |
| Colombia                         | Upper middle income | Default          | 0.34                  | 0.83 (0.75,0.87)    | 0.83 (0.75,0.87) | 359 (280,453)           | 359 (280,453) |
| Colombia                         | Upper middle income | 2 dose threshold | 0.43                  | 0.83 (0.75,0.87)    | 0.83 (0.75,0.87) | 359 (280,453)           | 359 (280,453) |
| Colombia                         | Upper middle income | 40+ threshold    | 0.50                  | 0.83 (0.75,0.87)    | 0.83 (0.75,0.87) | 355 (277,448)           | 355 (277,448) |
| Colombia                         | Upper middle income | 65+ threshold    | 0.50                  | 0.81 (0.73,0.86)    | 0.75 (0.58,0.86) | 322 (253,411)           | 310 (233,404) |
| Colombia                         | Upper middle income | Full sharing     | 0.51                  | 0.80 (0.70,0.85)    | 0.29 (0.25,0.34) | 282 (223,353)           | 117 (101,134) |
| Comoros                          | Lower middle income | Default          | 0.11                  | 0.80 (0.75,0.84)    | 0.80 (0.75,0.84) | 33 (20,49)              | 33 (20,49)    |
| Comoros                          | Lower middle income | 2 dose threshold | 0.21                  | 0.80 (0.75,0.84)    | 0.80 (0.75,0.84) | 33 (20,49)              | 33 (20,49)    |
| Comoros                          | Lower middle income | 40+ threshold    | 0.32                  | 0.79 (0.74,0.84)    | 0.79 (0.74,0.84) | 33 (20,49)              | 33 (20,49)    |
| Comoros                          | Lower middle income | 65+ threshold    | 0.40                  | 0.79 (0.74,0.83)    | 0.79 (0.73,0.83) | 32 (20,48)              | 32 (20,48)    |
| Comoros                          | Lower middle income | Full sharing     | 0.42                  | 0.79 (0.73,0.83)    | 0.31 (0.27,0.38) | 28 (18,43)              | 9 (7,12)      |
| Cabo Verde                       | Lower middle income | Default          | 0.00                  | 0.84 (0.77,0.88)    | 0.84 (0.77,0.88) | 164 (99,258)            | 164 (99,258)  |
| Cabo Verde                       | Lower middle income | 2 dose threshold | 0.11                  | 0.84 (0.77,0.88)    | 0.84 (0.77,0.88) | 163 (98,258)            | 163 (98,258)  |
| Cabo Verde                       | Lower middle income | 40+ threshold    | 0.30                  | 0.83 (0.76,0.88)    | 0.83 (0.77,0.88) | 155 (94,249)            | 156 (94,249)  |
| Cabo Verde                       | Lower middle income | 65+ threshold    | 0.45                  | 0.82 (0.74,0.87)    | 0.81 (0.73,0.87) | 128 (77,209)            | 127 (76,208)  |
| Cabo Verde                       | Lower middle income | Full sharing     | 0.48                  | 0.79 (0.71,0.85)    | 0.41 (0.33,0.50) | 94 (57,150)             | 47 (33,64)    |
| Costa Rica                       | Upper middle income | Default          | 0.49                  | 0.76 (0.67,0.81)    | 0.76 (0.67,0.81) | 128 (102,164)           | 128 (102,164) |
| Costa Rica                       | Upper middle income | 2 dose threshold | 0.56                  | 0.76 (0.67,0.81)    | 0.76 (0.67,0.81) | 128 (102,164)           | 128 (102,164) |
| Costa Rica                       | Upper middle income | 40+ threshold    | 0.55                  | 0.76 (0.66,0.81)    | 0.76 (0.66,0.81) | 127 (101,163)           | 127 (101,163) |
| Costa Rica                       | Upper middle income | 65+ threshold    | 0.52                  | 0.75 (0.64,0.80)    | 0.64 (0.47,0.78) | 118 (95,149)            | 111 (86,144)  |
| Costa Rica                       | Upper middle income | Full sharing     | 0.51                  | 0.74 (0.64,0.80)    | 0.26 (0.20,0.33) | 121 (96,155)            | 51 (49,55)    |
| Cuba                             | Upper middle income | Default          | 0.36                  | 0.57 (0.44,0.78)    | 0.57 (0.44,0.78) | 220 (138,319)           | 220 (138,319) |
| Cuba                             | Upper middle income | 2 dose threshold | 0.45                  | 0.57 (0.44,0.78)    | 0.57 (0.44,0.78) | 220 (137,319)           | 220 (137,319) |
| Cuba                             | Upper middle income | 40+ threshold    | 0.60                  | 0.56 (0.43,0.78)    | 0.56 (0.43,0.78) | 210 (124,316)           | 211 (124,316) |
| Cuba                             | Upper middle income | 65+ threshold    | 0.50                  | 0.53 (0.36,0.78)    | 0.49 (0.22,0.78) | 154 (62,282)            | 148 (51,281)  |
| Cuba                             | Upper middle income | Full sharing     | 0.53                  | 0.48 (0.28,0.75)    | 0.01 (0.01,0.02) | 102 (38,197)            | 3 (2,5)       |
| Cyprus                           | High income         | Default          | 0.57                  | 0.51 (0.28,0.76)    | 0.51 (0.28,0.76) | 86 (46,135)             | 86 (46,135)   |
| Cyprus                           | High income         | 2 dose threshold | 0.64                  | 0.51 (0.28,0.76)    | 0.51 (0.28,0.76) | 86 (46,135)             | 86 (46,135)   |
| Cyprus                           | High income         | 40+ threshold    | 0.65                  | 0.51 (0.27,0.76)    | 0.51 (0.28,0.76) | 85 (45,135)             | 85 (45,135)   |
| Cyprus                           | High income         | 65+ threshold    | 0.56                  | 0.51 (0.30,0.75)    | 0.48 (0.19,0.75) | 81 (45,129)             | 79 (40,128)   |
| Cyprus                           | High income         | Full sharing     | 0.53                  | 0.52 (0.30,0.77)    | 0.11 (0.09,0.15) | 101 (54,161)            | 22 (19,26)    |
| Czech Republic                   | High income         | Default          | 0.71                  | 0.76 (0.70,0.82)    | 0.76 (0.70,0.82) | 233 (168,317)           | 233 (168,317) |

| Country            | Income bracket      | Strategy         | Proportion vaccinated | Proportion infected |                  | Mortalities per 100,000 |               |
|--------------------|---------------------|------------------|-----------------------|---------------------|------------------|-------------------------|---------------|
|                    |                     |                  |                       | unchanged           | adapted          | unchanged               | adapted       |
| Czech Republic     | High income         | 2 dose threshold | 0.76                  | 0.76 (0.70,0.82)    | 0.76 (0.70,0.82) | 233 (168,317)           | 233 (168,317) |
| Czech Republic     | High income         | 40+ threshold    | 0.71                  | 0.76 (0.70,0.82)    | 0.76 (0.70,0.82) | 232 (168,317)           | 232 (168,317) |
| Czech Republic     | High income         | 65+ threshold    | 0.58                  | 0.77 (0.70,0.82)    | 0.75 (0.67,0.83) | 232 (168,316)           | 231 (168,316) |
| Czech Republic     | High income         | Full sharing     | 0.53                  | 0.77 (0.70,0.83)    | 0.42 (0.28,0.53) | 247 (177,338)           | 147 (124,168) |
| Germany            | High income         | Default          | 0.83                  | 0.41 (0.20,0.55)    | 0.41 (0.20,0.55) | 200 (125,293)           | 200 (125,293) |
| Germany            | High income         | 2 dose threshold | 0.87                  | 0.41 (0.20,0.55)    | 0.41 (0.20,0.55) | 200 (125,292)           | 200 (125,292) |
| Germany            | High income         | 40+ threshold    | 0.75                  | 0.41 (0.20,0.55)    | 0.41 (0.20,0.55) | 199 (125,290)           | 199 (125,291) |
| Germany            | High income         | 65+ threshold    | 0.60                  | 0.41 (0.21,0.54)    | 0.38 (0.18,0.55) | 192 (127,277)           | 187 (120,282) |
| Germany            | High income         | Full sharing     | 0.53                  | 0.43 (0.23,0.56)    | 0.09 (0.08,0.09) | 239 (145,353)           | 67 (56,80)    |
| Djibouti           | Lower middle income | Default          | 0.03                  | 0.83 (0.71,0.92)    | 0.83 (0.71,0.92) | 330 (165,613)           | 330 (165,613) |
| Djibouti           | Lower middle income | 2 dose threshold | 0.14                  | 0.83 (0.71,0.92)    | 0.83 (0.71,0.92) | 330 (165,613)           | 330 (165,613) |
| Djibouti           | Lower middle income | 40+ threshold    | 0.32                  | 0.82 (0.70,0.92)    | 0.82 (0.70,0.92) | 320 (160,599)           | 321 (161,600) |
| Djibouti           | Lower middle income | 65+ threshold    | 0.45                  | 0.81 (0.68,0.92)    | 0.80 (0.67,0.92) | 290 (144,540)           | 288 (144,536) |
| Djibouti           | Lower middle income | Full sharing     | 0.47                  | 0.79 (0.65,0.91)    | 0.37 (0.30,0.43) | 212 (108,381)           | 94 (58,144)   |
| Denmark            | High income         | Default          | 0.86                  | 0.39 (0.20,0.51)    | 0.39 (0.20,0.51) | 159 (102,232)           | 159 (102,232) |
| Denmark            | High income         | 2 dose threshold | 0.90                  | 0.39 (0.20,0.51)    | 0.39 (0.20,0.51) | 159 (102,232)           | 159 (102,232) |
| Denmark            | High income         | 40+ threshold    | 0.70                  | 0.39 (0.20,0.51)    | 0.39 (0.20,0.51) | 158 (101,231)           | 158 (101,231) |
| Denmark            | High income         | 65+ threshold    | 0.59                  | 0.39 (0.20,0.50)    | 0.26 (0.15,0.39) | 155 (103,220)           | 136 (91,192)  |
| Denmark            | High income         | Full sharing     | 0.53                  | 0.42 (0.21,0.54)    | 0.09 (0.07,0.11) | 211 (131,317)           | 63 (49,75)    |
| Dominican Republic | Upper middle income | Default          | 0.70                  | 0.59 (0.44,0.68)    | 0.59 (0.44,0.68) | 201 (131,276)           | 201 (131,276) |
| Dominican Republic | Upper middle income | 2 dose threshold | 0.74                  | 0.59 (0.44,0.68)    | 0.59 (0.44,0.68) | 201 (131,276)           | 201 (131,276) |
| Dominican Republic | Upper middle income | 40+ threshold    | 0.52                  | 0.58 (0.44,0.67)    | 0.58 (0.43,0.68) | 200 (131,274)           | 201 (131,274) |
| Dominican Republic | Upper middle income | 65+ threshold    | 0.48                  | 0.60 (0.45,0.69)    | 0.45 (0.33,0.56) | 200 (130,273)           | 187 (123,252) |
| Dominican Republic | Upper middle income | Full sharing     | 0.48                  | 0.59 (0.43,0.68)    | 0.23 (0.17,0.30) | 177 (115,242)           | 75 (53,97)    |
| Algeria            | Lower middle income | Default          | 0.08                  | 0.57 (0.33,0.71)    | 0.57 (0.33,0.71) | 152 (85,231)            | 152 (85,231)  |
| Algeria            | Lower middle income | 2 dose threshold | 0.19                  | 0.57 (0.33,0.71)    | 0.57 (0.33,0.71) | 152 (85,231)            | 152 (85,231)  |
| Algeria            | Lower middle income | 40+ threshold    | 0.34                  | 0.57 (0.32,0.70)    | 0.57 (0.32,0.70) | 144 (80,221)            | 144 (80,221)  |
| Algeria            | Lower middle income | 65+ threshold    | 0.45                  | 0.51 (0.27,0.66)    | 0.29 (0.18,0.49) | 107 (63,158)            | 87 (56,133)   |
| Algeria            | Lower middle income | Full sharing     | 0.46                  | 0.47 (0.23,0.63)    | 0.12 (0.10,0.15) | 89 (55,129)             | 36 (28,44)    |
| Ecuador            | Upper middle income | Default          | 0.29                  | 0.86 (0.84,0.88)    | 0.86 (0.84,0.88) | 603 (391,866)           | 603 (391,866) |
| Ecuador            | Upper middle income | 2 dose threshold | 0.38                  | 0.86 (0.84,0.88)    | 0.86 (0.84,0.88) | 603 (391,866)           | 603 (391,866) |
| Ecuador            | Upper middle income | 40+ threshold    | 0.45                  | 0.86 (0.84,0.88)    | 0.86 (0.84,0.88) | 599 (389,859)           | 600 (389,860) |
| Ecuador            | Upper middle income | 65+ threshold    | 0.47                  | 0.85 (0.83,0.87)    | 0.83 (0.77,0.87) | 572 (370,835)           | 568 (370,828) |
| Ecuador            | Upper middle income | Full sharing     | 0.48                  | 0.84 (0.82,0.87)    | 0.48 (0.43,0.51) | 501 (323,722)           | 294 (208,394) |
| Egypt              | Lower middle income | Default          | 0.05                  | 0.77 (0.70,0.86)    | 0.77 (0.70,0.86) | 196 (89,324)            | 196 (89,324)  |

| Country        | Income bracket      | Strategy         | Proportion vaccinated | Proportion infected |                  | Mortalities per 100,000 |               |
|----------------|---------------------|------------------|-----------------------|---------------------|------------------|-------------------------|---------------|
|                |                     |                  |                       | unchanged           | adapted          | unchanged               | adapted       |
| Egypt          | Lower middle income | 2 dose threshold | 0.15                  | 0.77 (0.70,0.86)    | 0.77 (0.70,0.86) | 196 (89,324)            | 196 (89,324)  |
| Egypt          | Lower middle income | 40+ threshold    | 0.31                  | 0.77 (0.70,0.86)    | 0.77 (0.70,0.86) | 193 (88,318)            | 193 (88,318)  |
| Egypt          | Lower middle income | 65+ threshold    | 0.42                  | 0.76 (0.66,0.85)    | 0.74 (0.59,0.85) | 171 (82,287)            | 169 (82,287)  |
| Egypt          | Lower middle income | Full sharing     | 0.44                  | 0.73 (0.62,0.84)    | 0.39 (0.25,0.53) | 141 (70,225)            | 76 (47,96)    |
| Spain          | High income         | Default          | 0.83                  | 0.52 (0.42,0.60)    | 0.52 (0.42,0.60) | 547 (409,672)           | 547 (409,672) |
| Spain          | High income         | 2 dose threshold | 0.87                  | 0.52 (0.42,0.60)    | 0.52 (0.42,0.60) | 547 (409,672)           | 547 (409,672) |
| Spain          | High income         | 40+ threshold    | 0.73                  | 0.52 (0.42,0.59)    | 0.52 (0.42,0.59) | 546 (408,671)           | 546 (408,671) |
| Spain          | High income         | 65+ threshold    | 0.59                  | 0.57 (0.47,0.65)    | 0.39 (0.33,0.46) | 560 (419,686)           | 523 (391,643) |
| Spain          | High income         | Full sharing     | 0.53                  | 0.60 (0.49,0.68)    | 0.16 (0.15,0.18) | 663 (490,825)           | 247 (206,283) |
| Estonia        | High income         | Default          | 0.62                  | 0.59 (0.42,0.73)    | 0.59 (0.42,0.73) | 198 (129,292)           | 198 (129,292) |
| Estonia        | High income         | 2 dose threshold | 0.68                  | 0.59 (0.42,0.73)    | 0.59 (0.42,0.73) | 198 (129,292)           | 198 (129,292) |
| Estonia        | High income         | 40+ threshold    | 0.70                  | 0.59 (0.41,0.73)    | 0.59 (0.41,0.73) | 197 (128,292)           | 197 (128,292) |
| Estonia        | High income         | 65+ threshold    | 0.59                  | 0.60 (0.46,0.73)    | 0.58 (0.36,0.73) | 194 (129,285)           | 193 (124,285) |
| Estonia        | High income         | Full sharing     | 0.52                  | 0.62 (0.50,0.74)    | 0.12 (0.10,0.14) | 241 (157,354)           | 52 (40,67)    |
| Ethiopia       | Low income          | Default          | 0.02                  | 0.71 (0.52,0.78)    | 0.71 (0.52,0.78) | 144 (79,266)            | 144 (79,266)  |
| Ethiopia       | Low income          | 2 dose threshold | 0.13                  | 0.71 (0.52,0.78)    | 0.71 (0.52,0.78) | 144 (79,265)            | 144 (79,265)  |
| Ethiopia       | Low income          | 40+ threshold    | 0.28                  | 0.70 (0.51,0.78)    | 0.70 (0.51,0.78) | 139 (77,255)            | 139 (77,256)  |
| Ethiopia       | Low income          | 65+ threshold    | 0.40                  | 0.68 (0.46,0.77)    | 0.69 (0.45,0.78) | 115 (64,215)            | 115 (64,214)  |
| Ethiopia       | Low income          | Full sharing     | 0.42                  | 0.65 (0.41,0.76)    | 0.20 (0.13,0.27) | 83 (49,147)             | 29 (21,39)    |
| Finland        | High income         | Default          | 0.90                  | 0.40 (0.24,0.51)    | 0.40 (0.24,0.51) | 174 (92,329)            | 174 (92,329)  |
| Finland        | High income         | 2 dose threshold | 0.93                  | 0.40 (0.24,0.51)    | 0.40 (0.24,0.51) | 174 (92,329)            | 174 (92,329)  |
| Finland        | High income         | 40+ threshold    | 0.73                  | 0.40 (0.23,0.51)    | 0.40 (0.24,0.51) | 174 (91,328)            | 174 (91,328)  |
| Finland        | High income         | 65+ threshold    | 0.60                  | 0.43 (0.29,0.52)    | 0.35 (0.19,0.53) | 176 (96,320)            | 167 (89,316)  |
| Finland        | High income         | Full sharing     | 0.52                  | 0.47 (0.32,0.56)    | 0.11 (0.07,0.15) | 225 (111,465)           | 65 (44,92)    |
| France         | High income         | Default          | 0.79                  | 0.64 (0.52,0.69)    | 0.64 (0.52,0.69) | 288 (230,371)           | 288 (230,371) |
| France         | High income         | 2 dose threshold | 0.83                  | 0.64 (0.52,0.69)    | 0.64 (0.52,0.69) | 288 (230,371)           | 288 (230,371) |
| France         | High income         | 40+ threshold    | 0.71                  | 0.64 (0.52,0.69)    | 0.64 (0.52,0.69) | 287 (230,370)           | 287 (230,371) |
| France         | High income         | 65+ threshold    | 0.58                  | 0.65 (0.53,0.69)    | 0.54 (0.39,0.68) | 286 (229,367)           | 275 (221,369) |
| France         | High income         | Full sharing     | 0.52                  | 0.66 (0.54,0.71)    | 0.20 (0.17,0.23) | 328 (259,425)           | 135 (117,154) |
| Gabon          | Upper middle income | Default          | 0.02                  | 0.54 (0.42,0.62)    | 0.54 (0.42,0.62) | 131 (98,193)            | 131 (98,193)  |
| Gabon          | Upper middle income | 2 dose threshold | 0.13                  | 0.54 (0.42,0.61)    | 0.54 (0.42,0.61) | 131 (97,193)            | 131 (97,193)  |
| Gabon          | Upper middle income | 40+ threshold    | 0.29                  | 0.52 (0.40,0.60)    | 0.52 (0.39,0.60) | 121 (80,185)            | 121 (80,185)  |
| Gabon          | Upper middle income | 65+ threshold    | 0.41                  | 0.47 (0.32,0.59)    | 0.44 (0.28,0.59) | 95 (59,142)             | 93 (56,141)   |
| Gabon          | Upper middle income | Full sharing     | 0.43                  | 0.43 (0.30,0.56)    | 0.16 (0.13,0.20) | 72 (48,100)             | 29 (22,37)    |
| United Kingdom | High income         | Default          | 1.00                  | 0.36 (0.31,0.42)    | 0.36 (0.31,0.42) | 248 (198,306)           | 248 (198,306) |

| Country           | Income bracket      | Strategy         | Proportion vaccinated | Proportion infected |                  | Mortalities per 100,000 |               |
|-------------------|---------------------|------------------|-----------------------|---------------------|------------------|-------------------------|---------------|
|                   |                     |                  |                       | unchanged           | adapted          | unchanged               | adapted       |
| United Kingdom    | High income         | 2 dose threshold | 0.94                  | 0.36 (0.31,0.42)    | 0.35 (0.30,0.42) | 248 (198,306)           | 247 (197,306) |
| United Kingdom    | High income         | 40+ threshold    | 0.70                  | 0.63 (0.55,0.68)    | 0.33 (0.27,0.42) | 277 (221,351)           | 246 (196,303) |
| United Kingdom    | High income         | 65+ threshold    | 0.59                  | 0.75 (0.71,0.78)    | 0.44 (0.34,0.55) | 319 (245,421)           | 279 (214,358) |
| United Kingdom    | High income         | Full sharing     | 0.52                  | 0.80 (0.76,0.83)    | 0.16 (0.15,0.18) | 547 (392,760)           | 186 (156,223) |
| Georgia           | Upper middle income | Default          | 0.06                  | 0.92 (0.90,0.94)    | 0.92 (0.90,0.94) | 492 (402,580)           | 492 (402,580) |
| Georgia           | Upper middle income | 2 dose threshold | 0.17                  | 0.92 (0.90,0.94)    | 0.92 (0.90,0.94) | 492 (402,579)           | 492 (402,579) |
| Georgia           | Upper middle income | 40+ threshold    | 0.35                  | 0.92 (0.90,0.94)    | 0.92 (0.90,0.94) | 487 (397,574)           | 487 (397,574) |
| Georgia           | Upper middle income | 65+ threshold    | 0.49                  | 0.92 (0.89,0.94)    | 0.88 (0.85,0.91) | 473 (385,567)           | 470 (383,567) |
| Georgia           | Upper middle income | Full sharing     | 0.51                  | 0.92 (0.89,0.93)    | 0.63 (0.59,0.67) | 447 (363,536)           | 348 (297,404) |
| Ghana             | Lower middle income | Default          | 0.04                  | 0.61 (0.46,0.73)    | 0.61 (0.46,0.73) | 75 (53,96)              | 75 (53,96)    |
| Ghana             | Lower middle income | 2 dose threshold | 0.14                  | 0.61 (0.46,0.73)    | 0.61 (0.46,0.73) | 75 (52,96)              | 75 (52,96)    |
| Ghana             | Lower middle income | 40+ threshold    | 0.30                  | 0.58 (0.44,0.71)    | 0.58 (0.45,0.71) | 70 (49,95)              | 70 (49,95)    |
| Ghana             | Lower middle income | 65+ threshold    | 0.42                  | 0.49 (0.38,0.58)    | 0.42 (0.33,0.50) | 62 (44,87)              | 61 (43,84)    |
| Ghana             | Lower middle income | Full sharing     | 0.43                  | 0.45 (0.35,0.54)    | 0.14 (0.10,0.17) | 55 (39,77)              | 17 (12,21)    |
| Guinea            | Low income          | Default          | 0.04                  | 0.72 (0.65,0.78)    | 0.72 (0.65,0.78) | 77 (44,130)             | 77 (44,130)   |
| Guinea            | Low income          | 2 dose threshold | 0.14                  | 0.72 (0.64,0.78)    | 0.72 (0.64,0.78) | 77 (44,130)             | 77 (44,130)   |
| Guinea            | Low income          | 40+ threshold    | 0.28                  | 0.72 (0.64,0.78)    | 0.72 (0.64,0.78) | 73 (42,123)             | 73 (42,123)   |
| Guinea            | Low income          | 65+ threshold    | 0.38                  | 0.67 (0.56,0.74)    | 0.57 (0.39,0.69) | 58 (36,99)              | 55 (33,99)    |
| Guinea            | Low income          | Full sharing     | 0.40                  | 0.62 (0.46,0.71)    | 0.21 (0.15,0.27) | 44 (29,72)              | 19 (13,26)    |
| Gambia            | Low income          | Default          | 0.02                  | 0.80 (0.72,0.86)    | 0.80 (0.72,0.86) | 229 (150,342)           | 229 (150,342) |
| Gambia            | Low income          | 2 dose threshold | 0.12                  | 0.80 (0.72,0.86)    | 0.80 (0.72,0.86) | 228 (150,342)           | 228 (150,342) |
| Gambia            | Low income          | 40+ threshold    | 0.26                  | 0.80 (0.72,0.86)    | 0.80 (0.72,0.86) | 212 (136,313)           | 212 (136,312) |
| Gambia            | Low income          | 65+ threshold    | 0.37                  | 0.75 (0.67,0.81)    | 0.58 (0.47,0.67) | 164 (107,234)           | 150 (95,224)  |
| Gambia            | Low income          | Full sharing     | 0.40                  | 0.69 (0.59,0.76)    | 0.30 (0.25,0.35) | 135 (89,190)            | 62 (43,86)    |
| Guinea-Bissau     | Low income          | Default          | 0.02                  | 0.70 (0.61,0.77)    | 0.70 (0.61,0.77) | 121 (69,177)            | 121 (69,177)  |
| Guinea-Bissau     | Low income          | 2 dose threshold | 0.12                  | 0.70 (0.61,0.77)    | 0.70 (0.61,0.77) | 121 (69,177)            | 121 (69,177)  |
| Guinea-Bissau     | Low income          | 40+ threshold    | 0.27                  | 0.70 (0.61,0.76)    | 0.70 (0.61,0.76) | 113 (64,165)            | 113 (64,165)  |
| Guinea-Bissau     | Low income          | 65+ threshold    | 0.39                  | 0.62 (0.54,0.70)    | 0.56 (0.46,0.67) | 89 (51,132)             | 86 (51,127)   |
| Guinea-Bissau     | Low income          | Full sharing     | 0.41                  | 0.58 (0.50,0.67)    | 0.33 (0.26,0.41) | 76 (44,113)             | 43 (27,57)    |
| Equatorial Guinea | Upper middle income | Default          | 0.16                  | 0.62 (0.53,0.68)    | 0.62 (0.53,0.68) | 139 (87,220)            | 139 (87,220)  |
| Equatorial Guinea | Upper middle income | 2 dose threshold | 0.25                  | 0.62 (0.53,0.68)    | 0.62 (0.53,0.68) | 139 (87,219)            | 139 (87,219)  |
| Equatorial Guinea | Upper middle income | 40+ threshold    | 0.36                  | 0.62 (0.52,0.68)    | 0.61 (0.52,0.67) | 136 (85,214)            | 136 (85,215)  |
| Equatorial Guinea | Upper middle income | 65+ threshold    | 0.42                  | 0.60 (0.49,0.67)    | 0.54 (0.42,0.66) | 122 (77,184)            | 118 (75,182)  |
| Equatorial Guinea | Upper middle income | Full sharing     | 0.43                  | 0.57 (0.45,0.65)    | 0.30 (0.25,0.37) | 100 (64,148)            | 54 (37,77)    |
| Greece            | High income         | Default          | 0.69                  | 0.50 (0.21,0.76)    | 0.50 (0.21,0.76) | 303 (159,454)           | 303 (159,454) |



| Country   | Income bracket      | Strategy         | Proportion vaccinated | Proportion infected |                  | Mortalities per 100,000 |               |
|-----------|---------------------|------------------|-----------------------|---------------------|------------------|-------------------------|---------------|
|           |                     |                  |                       | unchanged           | adapted          | unchanged               | adapted       |
| Greece    | High income         | 2 dose threshold | 0.75                  | 0.50 (0.21,0.76)    | 0.50 (0.21,0.76) | 303 (159,454)           | 303 (159,454) |
| Greece    | High income         | 40+ threshold    | 0.73                  | 0.50 (0.20,0.76)    | 0.50 (0.20,0.76) | 302 (157,453)           | 302 (157,453) |
| Greece    | High income         | 65+ threshold    | 0.60                  | 0.50 (0.22,0.75)    | 0.48 (0.18,0.75) | 288 (154,435)           | 284 (147,435) |
| Greece    | High income         | Full sharing     | 0.54                  | 0.53 (0.25,0.78)    | 0.06 (0.05,0.07) | 383 (191,575)           | 58 (55,64)    |
| Guatemala | Upper middle income | Default          | 0.06                  | 0.81 (0.77,0.86)    | 0.81 (0.77,0.86) | 243 (134,369)           | 243 (134,369) |
| Guatemala | Upper middle income | 2 dose threshold | 0.17                  | 0.81 (0.77,0.86)    | 0.81 (0.77,0.86) | 243 (134,368)           | 243 (134,368) |
| Guatemala | Upper middle income | 40+ threshold    | 0.32                  | 0.81 (0.77,0.85)    | 0.81 (0.77,0.85) | 235 (130,362)           | 235 (130,362) |
| Guatemala | Upper middle income | 65+ threshold    | 0.43                  | 0.78 (0.73,0.83)    | 0.71 (0.56,0.81) | 187 (111,286)           | 180 (104,276) |
| Guatemala | Upper middle income | Full sharing     | 0.45                  | 0.76 (0.69,0.81)    | 0.33 (0.27,0.40) | 147 (87,220)            | 70 (46,93)    |
| Guyana    | Upper middle income | Default          | 0.44                  | 0.71 (0.59,0.81)    | 0.71 (0.59,0.81) | 245 (146,380)           | 245 (146,380) |
| Guyana    | Upper middle income | 2 dose threshold | 0.51                  | 0.71 (0.59,0.81)    | 0.71 (0.59,0.81) | 245 (146,380)           | 245 (146,380) |
| Guyana    | Upper middle income | 40+ threshold    | 0.52                  | 0.71 (0.59,0.81)    | 0.70 (0.50,0.81) | 242 (145,376)           | 241 (142,376) |
| Guyana    | Upper middle income | 65+ threshold    | 0.47                  | 0.72 (0.64,0.81)    | 0.67 (0.41,0.81) | 223 (143,342)           | 218 (128,342) |
| Guyana    | Upper middle income | Full sharing     | 0.48                  | 0.71 (0.62,0.80)    | 0.26 (0.20,0.34) | 186 (124,280)           | 69 (48,91)    |
| Honduras  | Lower middle income | Default          | 0.11                  | 0.87 (0.84,0.88)    | 0.87 (0.84,0.88) | 405 (234,617)           | 405 (234,617) |
| Honduras  | Lower middle income | 2 dose threshold | 0.23                  | 0.87 (0.84,0.88)    | 0.87 (0.84,0.88) | 405 (234,617)           | 405 (234,617) |
| Honduras  | Lower middle income | 40+ threshold    | 0.35                  | 0.87 (0.84,0.88)    | 0.87 (0.84,0.88) | 394 (229,604)           | 395 (229,604) |
| Honduras  | Lower middle income | 65+ threshold    | 0.45                  | 0.85 (0.82,0.86)    | 0.81 (0.74,0.86) | 334 (199,512)           | 329 (198,509) |
| Honduras  | Lower middle income | Full sharing     | 0.47                  | 0.83 (0.81,0.85)    | 0.39 (0.34,0.45) | 269 (159,405)           | 137 (95,183)  |
| Croatia   | High income         | Default          | 0.52                  | 0.76 (0.68,0.81)    | 0.76 (0.68,0.81) | 275 (204,363)           | 275 (204,363) |
| Croatia   | High income         | 2 dose threshold | 0.60                  | 0.76 (0.67,0.81)    | 0.76 (0.67,0.81) | 275 (204,363)           | 275 (204,363) |
| Croatia   | High income         | 40+ threshold    | 0.69                  | 0.76 (0.67,0.81)    | 0.76 (0.67,0.81) | 274 (204,362)           | 275 (204,362) |
| Croatia   | High income         | 65+ threshold    | 0.58                  | 0.76 (0.67,0.80)    | 0.75 (0.61,0.81) | 270 (201,355)           | 269 (200,352) |
| Croatia   | High income         | Full sharing     | 0.53                  | 0.76 (0.67,0.81)    | 0.35 (0.29,0.40) | 283 (209,373)           | 160 (129,198) |
| Hungary   | High income         | Default          | 0.84                  | 0.78 (0.64,0.84)    | 0.78 (0.64,0.84) | 261 (214,316)           | 261 (214,316) |
| Hungary   | High income         | 2 dose threshold | 0.87                  | 0.78 (0.64,0.84)    | 0.78 (0.64,0.84) | 260 (214,316)           | 260 (214,316) |
| Hungary   | High income         | 40+ threshold    | 0.74                  | 0.78 (0.64,0.84)    | 0.78 (0.64,0.84) | 260 (214,316)           | 260 (214,316) |
| Hungary   | High income         | 65+ threshold    | 0.59                  | 0.78 (0.66,0.84)    | 0.74 (0.58,0.85) | 261 (216,317)           | 257 (212,314) |
| Hungary   | High income         | Full sharing     | 0.53                  | 0.79 (0.67,0.85)    | 0.30 (0.23,0.35) | 288 (236,357)           | 135 (120,148) |
| Indonesia | Upper middle income | Default          | 0.16                  | 0.87 (0.77,0.91)    | 0.87 (0.77,0.91) | 165 (96,242)            | 165 (96,242)  |
| Indonesia | Upper middle income | 2 dose threshold | 0.27                  | 0.87 (0.77,0.91)    | 0.87 (0.77,0.91) | 165 (96,242)            | 165 (96,242)  |
| Indonesia | Upper middle income | 40+ threshold    | 0.40                  | 0.86 (0.76,0.91)    | 0.86 (0.77,0.91) | 162 (94,235)            | 162 (94,235)  |
| Indonesia | Upper middle income | 65+ threshold    | 0.48                  | 0.84 (0.72,0.90)    | 0.41 (0.31,0.53) | 140 (82,201)            | 100 (61,144)  |
| Indonesia | Upper middle income | Full sharing     | 0.49                  | 0.82 (0.66,0.89)    | 0.14 (0.11,0.17) | 123 (72,177)            | 32 (22,42)    |
| India     | Lower middle income | Default          | 0.30                  | 0.91 (0.82,0.94)    | 0.91 (0.82,0.94) | 243 (179,306)           | 243 (179,306) |

| Country | Income bracket      | Strategy         | Proportion vaccinated | Proportion infected |                  | Mortalities per 100,000 |               |
|---------|---------------------|------------------|-----------------------|---------------------|------------------|-------------------------|---------------|
|         |                     |                  |                       | unchanged           | adapted          | unchanged               | adapted       |
| India   | Lower middle income | 2 dose threshold | 0.39                  | 0.91 (0.82,0.94)    | 0.91 (0.82,0.94) | 243 (179,306)           | 243 (179,306) |
| India   | Lower middle income | 40+ threshold    | 0.45                  | 0.91 (0.82,0.94)    | 0.91 (0.82,0.94) | 241 (178,304)           | 241 (178,304) |
| India   | Lower middle income | 65+ threshold    | 0.48                  | 0.90 (0.81,0.94)    | 0.90 (0.81,0.94) | 225 (169,282)           | 225 (169,281) |
| India   | Lower middle income | Full sharing     | 0.49                  | 0.89 (0.80,0.93)    | 0.31 (0.28,0.34) | 194 (147,242)           | 78 (62,94)    |
| Ireland | High income         | Default          | 0.81                  | 0.39 (0.28,0.48)    | 0.39 (0.28,0.48) | 145 (122,171)           | 145 (122,171) |
| Ireland | High income         | 2 dose threshold | 0.84                  | 0.39 (0.28,0.48)    | 0.39 (0.28,0.48) | 145 (122,171)           | 145 (122,171) |
| Ireland | High income         | 40+ threshold    | 0.65                  | 0.39 (0.28,0.49)    | 0.40 (0.27,0.49) | 145 (123,170)           | 145 (122,170) |
| Ireland | High income         | 65+ threshold    | 0.54                  | 0.48 (0.35,0.58)    | 0.26 (0.21,0.33) | 158 (136,179)           | 135 (116,162) |
| Ireland | High income         | Full sharing     | 0.51                  | 0.52 (0.38,0.61)    | 0.09 (0.08,0.12) | 199 (164,230)           | 54 (51,62)    |
| Iran    | Upper middle income | Default          | 0.07                  | 0.79 (0.76,0.83)    | 0.79 (0.76,0.83) | 317 (209,457)           | 317 (209,457) |
| Iran    | Upper middle income | 2 dose threshold | 0.18                  | 0.79 (0.76,0.83)    | 0.79 (0.76,0.83) | 317 (209,456)           | 317 (209,456) |
| Iran    | Upper middle income | 40+ threshold    | 0.36                  | 0.79 (0.76,0.82)    | 0.79 (0.76,0.82) | 310 (206,446)           | 310 (207,447) |
| Iran    | Upper middle income | 65+ threshold    | 0.47                  | 0.77 (0.72,0.81)    | 0.74 (0.62,0.81) | 268 (179,383)           | 264 (178,382) |
| Iran    | Upper middle income | Full sharing     | 0.49                  | 0.76 (0.69,0.80)    | 0.37 (0.31,0.45) | 220 (148,307)           | 124 (94,159)  |
| Iraq    | Upper middle income | Default          | 0.02                  | 0.89 (0.83,0.94)    | 0.89 (0.83,0.94) | 348 (188,534)           | 348 (188,534) |
| Iraq    | Upper middle income | 2 dose threshold | 0.13                  | 0.89 (0.83,0.94)    | 0.89 (0.83,0.94) | 348 (188,534)           | 348 (188,534) |
| Iraq    | Upper middle income | 40+ threshold    | 0.29                  | 0.89 (0.83,0.94)    | 0.89 (0.83,0.94) | 338 (182,521)           | 338 (182,522) |
| Iraq    | Upper middle income | 65+ threshold    | 0.41                  | 0.88 (0.81,0.93)    | 0.88 (0.79,0.93) | 292 (152,454)           | 291 (152,453) |
| Iraq    | Upper middle income | Full sharing     | 0.43                  | 0.86 (0.78,0.92)    | 0.54 (0.48,0.60) | 220 (120,336)           | 150 (99,209)  |
| Iceland | High income         | Default          | 1.02                  | 0.19 (0.15,0.23)    | 0.19 (0.15,0.23) | 28 (24,33)              | 28 (24,33)    |
| Iceland | High income         | 2 dose threshold | 0.92                  | 0.19 (0.15,0.23)    | 0.19 (0.15,0.23) | 28 (24,33)              | 28 (24,33)    |
| Iceland | High income         | 40+ threshold    | 0.66                  | 0.21 (0.17,0.25)    | 0.23 (0.16,0.26) | 28 (24,33)              | 29 (25,34)    |
| Iceland | High income         | 65+ threshold    | 0.56                  | 0.28 (0.22,0.34)    | 0.17 (0.13,0.21) | 31 (27,35)              | 27 (23,32)    |
| Iceland | High income         | Full sharing     | 0.52                  | 0.31 (0.23,0.38)    | 0.19 (0.16,0.23) | 36 (31,40)              | 29 (24,34)    |
| Israel  | High income         | Default          | 0.88                  | 0.45 (0.38,0.52)    | 0.45 (0.38,0.52) | 57 (54,60)              | 57 (54,60)    |
| Israel  | High income         | 2 dose threshold | 0.80                  | 0.52 (0.44,0.59)    | 0.35 (0.29,0.40) | 61 (57,64)              | 52 (47,58)    |
| Israel  | High income         | 40+ threshold    | 0.57                  | 0.77 (0.72,0.80)    | 0.40 (0.33,0.53) | 81 (74,89)              | 55 (49,62)    |
| Israel  | High income         | 65+ threshold    | 0.52                  | 0.78 (0.70,0.82)    | 0.65 (0.53,0.71) | 95 (85,105)             | 84 (65,100)   |
| Israel  | High income         | Full sharing     | 0.52                  | 0.77 (0.70,0.82)    | 0.16 (0.14,0.18) | 101 (91,112)            | 45 (41,50)    |
| Italy   | High income         | Default          | 0.85                  | 0.61 (0.45,0.69)    | 0.61 (0.45,0.69) | 370 (298,456)           | 370 (298,456) |
| Italy   | High income         | 2 dose threshold | 0.89                  | 0.61 (0.45,0.69)    | 0.61 (0.45,0.69) | 369 (298,456)           | 369 (298,456) |
| Italy   | High income         | 40+ threshold    | 0.77                  | 0.60 (0.45,0.68)    | 0.60 (0.45,0.69) | 368 (297,455)           | 369 (297,455) |
| Italy   | High income         | 65+ threshold    | 0.61                  | 0.60 (0.45,0.68)    | 0.53 (0.35,0.68) | 363 (292,443)           | 353 (283,443) |
| Italy   | High income         | Full sharing     | 0.54                  | 0.62 (0.47,0.70)    | 0.18 (0.14,0.22) | 425 (338,530)           | 167 (150,178) |
| Jamaica | Upper middle income | Default          | 0.08                  | 0.55 (0.35,0.66)    | 0.55 (0.35,0.66) | 210 (125,369)           | 210 (125,369) |

| Country     | Income bracket      | Strategy         | Proportion vaccinated | Proportion infected |                  | Mortalities per 100,000 |                   |
|-------------|---------------------|------------------|-----------------------|---------------------|------------------|-------------------------|-------------------|
|             |                     |                  |                       | unchanged           | adapted          | unchanged               | adapted           |
| Jamaica     | Upper middle income | 2 dose threshold | 0.19                  | 0.55 (0.35,0.66)    | 0.55 (0.35,0.66) | 209 (125,369)           | 209 (125,369)     |
| Jamaica     | Upper middle income | 40+ threshold    | 0.37                  | 0.54 (0.33,0.66)    | 0.54 (0.33,0.66) | 203 (115,362)           | 203 (115,362)     |
| Jamaica     | Upper middle income | 65+ threshold    | 0.49                  | 0.51 (0.29,0.65)    | 0.46 (0.22,0.65) | 172 (86,315)            | 166 (73,313)      |
| Jamaica     | Upper middle income | Full sharing     | 0.50                  | 0.48 (0.26,0.64)    | 0.08 (0.06,0.11) | 130 (70,233)            | 26 (20,33)        |
| Japan       | High income         | Default          | 0.37                  | 0.36 (0.09,0.62)    | 0.36 (0.09,0.62) | 184 (61,335)            | 184 (61,335)      |
| Japan       | High income         | 2 dose threshold | 0.48                  | 0.36 (0.09,0.62)    | 0.36 (0.09,0.62) | 184 (61,335)            | 184 (61,335)      |
| Japan       | High income         | 40+ threshold    | 0.65                  | 0.35 (0.08,0.62)    | 0.36 (0.08,0.62) | 178 (56,329)            | 179 (56,330)      |
| Japan       | High income         | 65+ threshold    | 0.56                  | 0.30 (0.06,0.59)    | 0.29 (0.06,0.59) | 129 (39,256)            | 126 (37,254)      |
| Japan       | High income         | Full sharing     | 0.54                  | 0.23 (0.05,0.52)    | 0.02 (0.01,0.02) | 87 (31,180)             | 12 (9,15)         |
| Jordan      | Upper middle income | Default          | 0.37                  | 0.82 (0.75,0.90)    | 0.82 (0.75,0.90) | 207 (135,292)           | 207 (135,292)     |
| Jordan      | Upper middle income | 2 dose threshold | 0.45                  | 0.82 (0.75,0.90)    | 0.82 (0.75,0.90) | 207 (135,292)           | 207 (135,292)     |
| Jordan      | Upper middle income | 40+ threshold    | 0.43                  | 0.81 (0.75,0.90)    | 0.82 (0.75,0.90) | 205 (134,290)           | 205 (134,290)     |
| Jordan      | Upper middle income | 65+ threshold    | 0.45                  | 0.81 (0.75,0.90)    | 0.81 (0.73,0.90) | 197 (130,279)           | 197 (129,278)     |
| Jordan      | Upper middle income | Full sharing     | 0.46                  | 0.80 (0.74,0.89)    | 0.43 (0.37,0.49) | 172 (114,240)           | 82 (59,108)       |
| Kazakhstan  | Upper middle income | Default          | 0.28                  | 0.84 (0.79,0.89)    | 0.84 (0.79,0.89) | 263 (144,437)           | 263 (144,437)     |
| Kazakhstan  | Upper middle income | 2 dose threshold | 0.37                  | 0.84 (0.79,0.89)    | 0.84 (0.79,0.89) | 263 (144,437)           | 263 (144,437)     |
| Kazakhstan  | Upper middle income | 40+ threshold    | 0.45                  | 0.84 (0.79,0.89)    | 0.84 (0.79,0.89) | 258 (142,428)           | 259 (142,428)     |
| Kazakhstan  | Upper middle income | 65+ threshold    | 0.45                  | 0.83 (0.78,0.87)    | 0.73 (0.59,0.83) | 222 (123,359)           | 211 (111,356)     |
| Kazakhstan  | Upper middle income | Full sharing     | 0.47                  | 0.82 (0.77,0.87)    | 0.29 (0.21,0.36) | 190 (107,301)           | 79 (54,104)       |
| Kenya       | Lower middle income | Default          | 0.03                  | 0.81 (0.75,0.84)    | 0.81 (0.75,0.84) | 136 (82,206)            | 136 (82,206)      |
| Kenya       | Lower middle income | 2 dose threshold | 0.13                  | 0.81 (0.75,0.84)    | 0.81 (0.75,0.84) | 136 (82,205)            | 136 (82,205)      |
| Kenya       | Lower middle income | 40+ threshold    | 0.29                  | 0.81 (0.74,0.84)    | 0.81 (0.74,0.84) | 133 (80,200)            | 133 (80,200)      |
| Kenya       | Lower middle income | 65+ threshold    | 0.41                  | 0.79 (0.71,0.83)    | 0.75 (0.60,0.83) | 115 (72,170)            | 112 (68,165)      |
| Kenya       | Lower middle income | Full sharing     | 0.43                  | 0.76 (0.66,0.81)    | 0.37 (0.28,0.44) | 92 (60,132)             | 50 (37,65)        |
| Kyrgyzstan  | Lower middle income | Default          | 0.04                  | 0.88 (0.86,0.91)    | 0.88 (0.86,0.91) | 317 (206,462)           | 317 (206,462)     |
| Kyrgyzstan  | Lower middle income | 2 dose threshold | 0.15                  | 0.88 (0.86,0.91)    | 0.88 (0.86,0.91) | 316 (206,462)           | 316 (206,462)     |
| Kyrgyzstan  | Lower middle income | 40+ threshold    | 0.31                  | 0.88 (0.86,0.91)    | 0.88 (0.86,0.91) | 309 (201,448)           | 309 (201,448)     |
| Kyrgyzstan  | Lower middle income | 65+ threshold    | 0.43                  | 0.87 (0.84,0.91)    | 0.86 (0.81,0.91) | 272 (172,407)           | 271 (170,406)     |
| Kyrgyzstan  | Lower middle income | Full sharing     | 0.45                  | 0.86 (0.83,0.90)    | 0.57 (0.53,0.60) | 222 (144,327)           | 163 (115,224)     |
| South Korea | High income         | Default          | 0.00                  | 0.28 (0.03,0.59)    | 0.28 (0.03,0.59) | -152 (-2230,2382)       | -152 (-2230,2382) |
| South Korea | High income         | 2 dose threshold | 0.52                  | 0.28 (0.03,0.59)    | 0.28 (0.03,0.59) | 32 (-1585,2381)         | 32 (-1585,2381)   |
| South Korea | High income         | 40+ threshold    | 0.67                  | 0.27 (0.03,0.59)    | 0.28 (0.03,0.59) | 23 (-1534,2327)         | 26 (-1545,2330)   |
| South Korea | High income         | 65+ threshold    | 0.54                  | 0.25 (0.02,0.57)    | 0.24 (0.02,0.57) | -13 (-1050,1718)        | -28 (-1009,1697)  |
| South Korea | High income         | Full sharing     | 0.55                  | 0.22 (0.02,0.55)    | 0.01 (0.01,0.01) | -26 (-773,1361)         | 6 (-13,44)        |
| Kuwait      | High income         | Default          | 0.70                  | 0.77 (0.69,0.82)    | 0.77 (0.69,0.82) | 84 (54,124)             | 84 (54,124)       |

| Country    | Income bracket      | Strategy         | Proportion vaccinated | Proportion infected |                  | Mortalities per 100,000 |               |
|------------|---------------------|------------------|-----------------------|---------------------|------------------|-------------------------|---------------|
|            |                     |                  |                       | unchanged           | adapted          | unchanged               | adapted       |
| Kuwait     | High income         | 2 dose threshold | 0.74                  | 0.77 (0.69,0.82)    | 0.77 (0.69,0.82) | 84 (54,124)             | 84 (54,124)   |
| Kuwait     | High income         | 40+ threshold    | 0.58                  | 0.77 (0.69,0.82)    | 0.77 (0.70,0.82) | 84 (54,124)             | 84 (55,124)   |
| Kuwait     | High income         | 65+ threshold    | 0.50                  | 0.81 (0.76,0.85)    | 0.60 (0.50,0.70) | 98 (62,149)             | 79 (51,115)   |
| Kuwait     | High income         | Full sharing     | 0.52                  | 0.80 (0.73,0.84)    | 0.31 (0.23,0.38) | 90 (57,138)             | 38 (29,48)    |
| Liberia    | Low income          | Default          | 0.02                  | 0.74 (0.57,0.83)    | 0.74 (0.57,0.83) | 123 (70,179)            | 123 (70,179)  |
| Liberia    | Low income          | 2 dose threshold | 0.12                  | 0.74 (0.57,0.83)    | 0.74 (0.57,0.83) | 123 (70,179)            | 123 (70,179)  |
| Liberia    | Low income          | 40+ threshold    | 0.28                  | 0.74 (0.56,0.83)    | 0.74 (0.56,0.83) | 113 (65,166)            | 114 (65,166)  |
| Liberia    | Low income          | 65+ threshold    | 0.40                  | 0.69 (0.49,0.79)    | 0.34 (0.24,0.43) | 66 (40,92)              | 48 (31,67)    |
| Liberia    | Low income          | Full sharing     | 0.42                  | 0.60 (0.40,0.72)    | 0.18 (0.14,0.25) | 51 (32,69)              | 23 (16,31)    |
| Libya      | Upper middle income | Default          | 0.08                  | 0.84 (0.77,0.89)    | 0.84 (0.77,0.89) | 268 (164,364)           | 268 (164,364) |
| Libya      | Upper middle income | 2 dose threshold | 0.19                  | 0.84 (0.77,0.89)    | 0.84 (0.77,0.89) | 268 (164,364)           | 268 (164,364) |
| Libya      | Upper middle income | 40+ threshold    | 0.36                  | 0.83 (0.77,0.89)    | 0.83 (0.77,0.89) | 255 (155,342)           | 255 (155,342) |
| Libya      | Upper middle income | 65+ threshold    | 0.46                  | 0.80 (0.75,0.84)    | 0.70 (0.62,0.78) | 210 (133,284)           | 202 (125,273) |
| Libya      | Upper middle income | Full sharing     | 0.48                  | 0.78 (0.73,0.83)    | 0.38 (0.34,0.43) | 173 (111,233)           | 89 (62,115)   |
| Sri Lanka  | Lower middle income | Default          | 0.19                  | 0.62 (0.31,0.91)    | 0.62 (0.31,0.91) | 34 (12,152)             | 34 (12,152)   |
| Sri Lanka  | Lower middle income | 2 dose threshold | 0.30                  | 0.62 (0.31,0.91)    | 0.62 (0.31,0.91) | 42 (12,152)             | 42 (12,152)   |
| Sri Lanka  | Lower middle income | 40+ threshold    | 0.45                  | 0.61 (0.30,0.91)    | 0.62 (0.30,0.91) | 41 (11,142)             | 41 (11,142)   |
| Sri Lanka  | Lower middle income | 65+ threshold    | 0.50                  | 0.57 (0.23,0.91)    | 0.51 (0.12,0.91) | 34 (7,90)               | 32 (6,88)     |
| Sri Lanka  | Lower middle income | Full sharing     | 0.50                  | 0.56 (0.22,0.91)    | 0.02 (0.01,0.02) | 35 (7,96)               | 2 (1,3)       |
| Lithuania  | High income         | Default          | 0.67                  | 0.78 (0.68,0.82)    | 0.78 (0.68,0.82) | 353 (246,512)           | 353 (246,512) |
| Lithuania  | High income         | 2 dose threshold | 0.72                  | 0.78 (0.68,0.82)    | 0.78 (0.68,0.82) | 353 (246,512)           | 353 (246,512) |
| Lithuania  | High income         | 40+ threshold    | 0.73                  | 0.77 (0.68,0.82)    | 0.77 (0.68,0.82) | 352 (246,511)           | 352 (246,511) |
| Lithuania  | High income         | 65+ threshold    | 0.59                  | 0.78 (0.70,0.83)    | 0.70 (0.55,0.78) | 352 (247,508)           | 345 (240,499) |
| Lithuania  | High income         | Full sharing     | 0.53                  | 0.80 (0.71,0.84)    | 0.38 (0.28,0.48) | 387 (267,573)           | 217 (171,289) |
| Luxembourg | High income         | Default          | 0.83                  | 0.55 (0.45,0.62)    | 0.55 (0.45,0.62) | 438 (374,510)           | 438 (374,510) |
| Luxembourg | High income         | 2 dose threshold | 0.87                  | 0.55 (0.45,0.62)    | 0.55 (0.45,0.62) | 438 (374,510)           | 438 (374,510) |
| Luxembourg | High income         | 40+ threshold    | 0.69                  | 0.55 (0.45,0.62)    | 0.55 (0.45,0.62) | 437 (373,509)           | 437 (373,509) |
| Luxembourg | High income         | 65+ threshold    | 0.57                  | 0.56 (0.47,0.63)    | 0.51 (0.41,0.60) | 436 (373,506)           | 429 (368,497) |
| Luxembourg | High income         | Full sharing     | 0.53                  | 0.57 (0.47,0.64)    | 0.25 (0.21,0.29) | 451 (382,528)           | 196 (178,214) |
| Latvia     | High income         | Default          | 0.48                  | 0.71 (0.63,0.78)    | 0.71 (0.63,0.78) | 232 (140,391)           | 232 (140,391) |
| Latvia     | High income         | 2 dose threshold | 0.56                  | 0.71 (0.63,0.78)    | 0.71 (0.63,0.78) | 232 (140,391)           | 232 (140,391) |
| Latvia     | High income         | 40+ threshold    | 0.66                  | 0.71 (0.62,0.77)    | 0.71 (0.62,0.77) | 231 (140,390)           | 231 (140,390) |
| Latvia     | High income         | 65+ threshold    | 0.56                  | 0.71 (0.62,0.77)    | 0.69 (0.55,0.76) | 224 (136,374)           | 223 (135,372) |
| Latvia     | High income         | Full sharing     | 0.52                  | 0.71 (0.63,0.78)    | 0.23 (0.17,0.30) | 232 (140,391)           | 90 (64,117)   |
| Morocco    | Lower middle income | Default          | 0.40                  | 0.79 (0.70,0.87)    | 0.79 (0.70,0.87) | 249 (142,358)           | 249 (142,358) |

| Country               | Income bracket      | Strategy         | Proportion vaccinated | Proportion infected |                  | Mortalities per 100,000 |               |
|-----------------------|---------------------|------------------|-----------------------|---------------------|------------------|-------------------------|---------------|
|                       |                     |                  |                       | unchanged           | adapted          | unchanged               | adapted       |
| Morocco               | Lower middle income | 2 dose threshold | 0.48                  | 0.79 (0.70,0.87)    | 0.79 (0.70,0.87) | 249 (142,358)           | 249 (142,358) |
| Morocco               | Lower middle income | 40+ threshold    | 0.53                  | 0.78 (0.70,0.86)    | 0.78 (0.70,0.86) | 248 (141,357)           | 248 (141,357) |
| Morocco               | Lower middle income | 65+ threshold    | 0.51                  | 0.79 (0.71,0.87)    | 0.63 (0.50,0.77) | 248 (141,352)           | 234 (134,348) |
| Morocco               | Lower middle income | Full sharing     | 0.48                  | 0.80 (0.72,0.88)    | 0.40 (0.33,0.48) | 240 (139,347)           | 148 (100,202) |
| Moldova               | Lower middle income | Default          | 0.16                  | 0.77 (0.70,0.82)    | 0.77 (0.70,0.82) | 282 (137,541)           | 282 (137,541) |
| Moldova               | Lower middle income | 2 dose threshold | 0.27                  | 0.77 (0.70,0.82)    | 0.77 (0.70,0.82) | 284 (137,541)           | 284 (137,541) |
| Moldova               | Lower middle income | 40+ threshold    | 0.46                  | 0.77 (0.70,0.82)    | 0.77 (0.70,0.82) | 282 (137,535)           | 282 (137,536) |
| Moldova               | Lower middle income | 65+ threshold    | 0.52                  | 0.76 (0.68,0.82)    | 0.73 (0.64,0.81) | 270 (132,503)           | 268 (132,503) |
| Moldova               | Lower middle income | Full sharing     | 0.53                  | 0.75 (0.66,0.81)    | 0.43 (0.33,0.52) | 235 (119,425)           | 135 (94,181)  |
| Madagascar            | Low income          | Default          | 0.01                  | 0.86 (0.78,0.91)    | 0.86 (0.78,0.91) | 111 (63,179)            | 111 (63,179)  |
| Madagascar            | Low income          | 2 dose threshold | 0.11                  | 0.86 (0.78,0.91)    | 0.86 (0.78,0.91) | 111 (63,179)            | 111 (63,179)  |
| Madagascar            | Low income          | 40+ threshold    | 0.27                  | 0.86 (0.78,0.91)    | 0.86 (0.78,0.91) | 109 (62,175)            | 109 (62,175)  |
| Madagascar            | Low income          | 65+ threshold    | 0.40                  | 0.86 (0.77,0.90)    | 0.86 (0.77,0.90) | 95 (54,152)             | 95 (54,152)   |
| Madagascar            | Low income          | Full sharing     | 0.42                  | 0.84 (0.74,0.89)    | 0.30 (0.23,0.38) | 72 (42,112)             | 30 (21,38)    |
| Maldives              | Upper middle income | Default          | 0.90                  | 0.70 (0.51,0.82)    | 0.70 (0.51,0.82) | 73 (48,109)             | 73 (48,109)   |
| Maldives              | Upper middle income | 2 dose threshold | 0.91                  | 0.70 (0.51,0.82)    | 0.70 (0.51,0.82) | 73 (48,109)             | 73 (48,109)   |
| Maldives              | Upper middle income | 40+ threshold    | 0.48                  | 0.86 (0.75,0.92)    | 0.38 (0.32,0.43) | 86 (55,125)             | 56 (38,77)    |
| Maldives              | Upper middle income | 65+ threshold    | 0.51                  | 0.94 (0.89,0.97)    | 0.42 (0.32,0.49) | 130 (81,202)            | 61 (40,87)    |
| Maldives              | Upper middle income | Full sharing     | 0.52                  | 0.94 (0.87,0.97)    | 0.19 (0.16,0.24) | 116 (72,180)            | 25 (17,34)    |
| Mexico                | Upper middle income | Default          | 0.37                  | 0.80 (0.76,0.84)    | 0.80 (0.76,0.84) | 450 (319,591)           | 450 (319,591) |
| Mexico                | Upper middle income | 2 dose threshold | 0.46                  | 0.80 (0.76,0.84)    | 0.80 (0.76,0.84) | 450 (319,591)           | 450 (319,591) |
| Mexico                | Upper middle income | 40+ threshold    | 0.50                  | 0.79 (0.75,0.84)    | 0.79 (0.75,0.83) | 448 (317,590)           | 448 (317,590) |
| Mexico                | Upper middle income | 65+ threshold    | 0.49                  | 0.79 (0.75,0.83)    | 0.72 (0.67,0.80) | 441 (313,580)           | 434 (301,579) |
| Mexico                | Upper middle income | Full sharing     | 0.49                  | 0.79 (0.74,0.83)    | 0.47 (0.44,0.50) | 418 (299,543)           | 262 (203,311) |
| Republic of Macedonia | Upper middle income | Default          | 0.52                  | 0.86 (0.82,0.88)    | 0.86 (0.82,0.88) | 460 (316,637)           | 460 (316,637) |
| Republic of Macedonia | Upper middle income | 2 dose threshold | 0.60                  | 0.85 (0.82,0.88)    | 0.85 (0.82,0.88) | 460 (316,637)           | 460 (316,637) |
| Republic of Macedonia | Upper middle income | 40+ threshold    | 0.65                  | 0.85 (0.82,0.88)    | 0.85 (0.82,0.88) | 457 (315,635)           | 457 (315,635) |
| Republic of Macedonia | Upper middle income | 65+ threshold    | 0.52                  | 0.85 (0.82,0.88)    | 0.83 (0.77,0.88) | 443 (307,620)           | 441 (307,619) |
| Republic of Macedonia | Upper middle income | Full sharing     | 0.53                  | 0.85 (0.81,0.88)    | 0.55 (0.49,0.59) | 401 (277,558)           | 280 (205,368) |
| Mali                  | Low income          | Default          | 0.01                  | 0.74 (0.64,0.80)    | 0.74 (0.64,0.80) | 108 (65,159)            | 108 (65,159)  |
| Mali                  | Low income          | 2 dose threshold | 0.10                  | 0.74 (0.64,0.80)    | 0.74 (0.64,0.80) | 108 (65,159)            | 108 (65,159)  |
| Mali                  | Low income          | 40+ threshold    | 0.25                  | 0.74 (0.64,0.80)    | 0.74 (0.64,0.80) | 104 (63,155)            | 105 (63,155)  |
| Mali                  | Low income          | 65+ threshold    | 0.36                  | 0.72 (0.60,0.79)    | 0.71 (0.56,0.79) | 90 (54,137)             | 89 (54,132)   |
| Mali                  | Low income          | Full sharing     | 0.38                  | 0.68 (0.55,0.77)    | 0.34 (0.27,0.42) | 70 (44,103)             | 41 (29,51)    |
| Malta                 | High income         | Default          | 1.06                  | 0.39 (0.28,0.53)    | 0.39 (0.28,0.53) | 216 (169,281)           | 216 (169,281) |

| Country    | Income bracket      | Strategy         | Proportion vaccinated | Proportion infected |                  | Mortalities per 100,000 |               |
|------------|---------------------|------------------|-----------------------|---------------------|------------------|-------------------------|---------------|
|            |                     |                  |                       | unchanged           | adapted          | unchanged               | adapted       |
| Malta      | High income         | 2 dose threshold | 0.99                  | 0.39 (0.29,0.53)    | 0.39 (0.28,0.53) | 216 (169,281)           | 216 (168,281) |
| Malta      | High income         | 40+ threshold    | 0.73                  | 0.42 (0.33,0.54)    | 0.39 (0.30,0.53) | 217 (172,282)           | 216 (169,281) |
| Malta      | High income         | 65+ threshold    | 0.60                  | 0.50 (0.46,0.56)    | 0.41 (0.32,0.52) | 234 (189,301)           | 222 (174,289) |
| Malta      | High income         | Full sharing     | 0.53                  | 0.54 (0.50,0.60)    | 0.19 (0.16,0.25) | 311 (242,409)           | 129 (105,167) |
| Myanmar    | Lower middle income | Default          | 0.07                  | 0.83 (0.56,0.96)    | 0.83 (0.56,0.96) | 203 (128,305)           | 203 (128,305) |
| Myanmar    | Lower middle income | 2 dose threshold | 0.19                  | 0.83 (0.56,0.96)    | 0.83 (0.56,0.96) | 203 (127,305)           | 203 (127,305) |
| Myanmar    | Lower middle income | 40+ threshold    | 0.36                  | 0.82 (0.55,0.96)    | 0.82 (0.55,0.96) | 188 (118,283)           | 188 (118,283) |
| Myanmar    | Lower middle income | 65+ threshold    | 0.48                  | 0.77 (0.45,0.94)    | 0.21 (0.15,0.29) | 125 (79,189)            | 64 (45,88)    |
| Myanmar    | Lower middle income | Full sharing     | 0.50                  | 0.72 (0.37,0.92)    | 0.10 (0.08,0.12) | 105 (66,161)            | 28 (20,37)    |
| Montenegro | Upper middle income | Default          | 0.34                  | 0.88 (0.88,0.89)    | 0.88 (0.88,0.89) | 375 (276,475)           | 375 (276,475) |
| Montenegro | Upper middle income | 2 dose threshold | 0.44                  | 0.88 (0.88,0.89)    | 0.88 (0.88,0.89) | 375 (276,475)           | 375 (276,475) |
| Montenegro | Upper middle income | 40+ threshold    | 0.57                  | 0.88 (0.87,0.89)    | 0.88 (0.87,0.89) | 374 (275,474)           | 374 (275,474) |
| Montenegro | Upper middle income | 65+ threshold    | 0.53                  | 0.88 (0.87,0.89)    | 0.85 (0.82,0.87) | 368 (271,465)           | 366 (269,463) |
| Montenegro | Upper middle income | Full sharing     | 0.52                  | 0.88 (0.87,0.89)    | 0.52 (0.49,0.56) | 343 (253,434)           | 216 (165,268) |
| Mozambique | Low income          | Default          | 0.02                  | 0.81 (0.68,0.88)    | 0.81 (0.68,0.88) | 113 (60,177)            | 113 (60,177)  |
| Mozambique | Low income          | 2 dose threshold | 0.11                  | 0.81 (0.68,0.88)    | 0.81 (0.68,0.88) | 113 (60,177)            | 113 (60,177)  |
| Mozambique | Low income          | 40+ threshold    | 0.26                  | 0.81 (0.68,0.88)    | 0.81 (0.68,0.88) | 103 (55,162)            | 103 (55,162)  |
| Mozambique | Low income          | 65+ threshold    | 0.38                  | 0.72 (0.56,0.81)    | 0.42 (0.27,0.54) | 66 (39,95)              | 56 (34,76)    |
| Mozambique | Low income          | Full sharing     | 0.40                  | 0.60 (0.41,0.73)    | 0.11 (0.07,0.15) | 55 (34,77)              | 12 (8,14)     |
| Mauritania | Lower middle income | Default          | 0.05                  | 0.76 (0.66,0.83)    | 0.76 (0.66,0.83) | 157 (97,233)            | 157 (97,233)  |
| Mauritania | Lower middle income | 2 dose threshold | 0.15                  | 0.76 (0.66,0.83)    | 0.76 (0.66,0.83) | 157 (97,233)            | 157 (97,233)  |
| Mauritania | Lower middle income | 40+ threshold    | 0.28                  | 0.75 (0.66,0.83)    | 0.75 (0.66,0.83) | 145 (88,219)            | 146 (88,219)  |
| Mauritania | Lower middle income | 65+ threshold    | 0.40                  | 0.68 (0.59,0.77)    | 0.52 (0.41,0.63) | 106 (63,160)            | 97 (57,150)   |
| Mauritania | Lower middle income | Full sharing     | 0.42                  | 0.62 (0.50,0.73)    | 0.32 (0.25,0.38) | 88 (54,130)             | 53 (37,73)    |
| Mauritius  | High income         | Default          | 0.63                  | 0.27 (0.13,0.44)    | 0.27 (0.13,0.44) | 30 (20,44)              | 30 (20,44)    |
| Mauritius  | High income         | 2 dose threshold | 0.70                  | 0.27 (0.13,0.44)    | 0.27 (0.13,0.44) | 30 (20,44)              | 30 (20,44)    |
| Mauritius  | High income         | 40+ threshold    | 0.59                  | 0.26 (0.12,0.43)    | 0.26 (0.12,0.43) | 29 (19,43)              | 29 (19,43)    |
| Mauritius  | High income         | 65+ threshold    | 0.55                  | 0.27 (0.12,0.45)    | 0.07 (0.04,0.13) | 32 (20,45)              | 15 (8,29)     |
| Mauritius  | High income         | Full sharing     | 0.53                  | 0.29 (0.12,0.49)    | 0.05 (0.04,0.07) | 38 (21,56)              | 13 (9,19)     |
| Malawi     | Low income          | Default          | 0.03                  | 0.83 (0.69,0.89)    | 0.83 (0.69,0.89) | 67 (38,106)             | 67 (38,106)   |
| Malawi     | Low income          | 2 dose threshold | 0.13                  | 0.83 (0.69,0.89)    | 0.83 (0.69,0.89) | 67 (38,105)             | 67 (38,105)   |
| Malawi     | Low income          | 40+ threshold    | 0.28                  | 0.82 (0.68,0.89)    | 0.82 (0.68,0.89) | 64 (37,102)             | 64 (37,102)   |
| Malawi     | Low income          | 65+ threshold    | 0.39                  | 0.75 (0.62,0.83)    | 0.63 (0.55,0.70) | 58 (34,96)              | 56 (33,95)    |
| Malawi     | Low income          | Full sharing     | 0.41                  | 0.71 (0.59,0.78)    | 0.18 (0.13,0.23) | 51 (30,86)              | 14 (10,19)    |
| Malaysia   | Upper middle income | Default          | 0.29                  | 0.75 (0.56,0.92)    | 0.75 (0.56,0.92) | 100 (59,173)            | 100 (59,173)  |

| Country     | Income bracket      | Strategy         | Proportion vaccinated | Proportion infected |                  | Mortalities per 100,000 |               |
|-------------|---------------------|------------------|-----------------------|---------------------|------------------|-------------------------|---------------|
|             |                     |                  |                       | unchanged           | adapted          | unchanged               | adapted       |
| Malaysia    | Upper middle income | 2 dose threshold | 0.39                  | 0.75 (0.56,0.92)    | 0.75 (0.56,0.92) | 100 (59,172)            | 100 (59,172)  |
| Malaysia    | Upper middle income | 40+ threshold    | 0.44                  | 0.75 (0.55,0.92)    | 0.75 (0.55,0.92) | 97 (55,170)             | 97 (55,171)   |
| Malaysia    | Upper middle income | 65+ threshold    | 0.49                  | 0.72 (0.51,0.91)    | 0.61 (0.16,0.91) | 75 (34,145)             | 71 (21,144)   |
| Malaysia    | Upper middle income | Full sharing     | 0.50                  | 0.69 (0.47,0.89)    | 0.03 (0.02,0.03) | 54 (27,102)             | 3 (2,4)       |
| Namibia     | Upper middle income | Default          | 0.07                  | 0.92 (0.89,0.94)    | 0.92 (0.89,0.94) | 182 (106,283)           | 182 (106,283) |
| Namibia     | Upper middle income | 2 dose threshold | 0.17                  | 0.92 (0.89,0.94)    | 0.92 (0.89,0.94) | 182 (106,282)           | 182 (106,282) |
| Namibia     | Upper middle income | 40+ threshold    | 0.32                  | 0.92 (0.89,0.94)    | 0.92 (0.89,0.94) | 173 (101,270)           | 173 (101,270) |
| Namibia     | Upper middle income | 65+ threshold    | 0.41                  | 0.91 (0.88,0.93)    | 0.90 (0.86,0.93) | 127 (77,202)            | 126 (75,201)  |
| Namibia     | Upper middle income | Full sharing     | 0.44                  | 0.89 (0.85,0.91)    | 0.26 (0.22,0.31) | 90 (58,137)             | 31 (23,42)    |
| Niger       | Low income          | Default          | 0.01                  | 0.47 (0.39,0.55)    | 0.47 (0.39,0.55) | 43 (27,60)              | 43 (27,60)    |
| Niger       | Low income          | 2 dose threshold | 0.10                  | 0.47 (0.38,0.54)    | 0.47 (0.38,0.54) | 43 (27,60)              | 43 (27,60)    |
| Niger       | Low income          | 40+ threshold    | 0.24                  | 0.46 (0.38,0.53)    | 0.46 (0.37,0.53) | 42 (26,59)              | 42 (26,59)    |
| Niger       | Low income          | 65+ threshold    | 0.34                  | 0.45 (0.35,0.53)    | 0.44 (0.35,0.52) | 40 (25,57)              | 40 (24,57)    |
| Niger       | Low income          | Full sharing     | 0.36                  | 0.44 (0.34,0.52)    | 0.23 (0.17,0.29) | 35 (22,49)              | 19 (14,24)    |
| Nigeria     | Lower middle income | Default          | 0.02                  | 0.62 (0.52,0.72)    | 0.62 (0.52,0.72) | 59 (30,86)              | 59 (30,86)    |
| Nigeria     | Lower middle income | 2 dose threshold | 0.11                  | 0.61 (0.52,0.71)    | 0.61 (0.52,0.71) | 59 (30,86)              | 59 (30,86)    |
| Nigeria     | Lower middle income | 40+ threshold    | 0.26                  | 0.59 (0.48,0.70)    | 0.59 (0.48,0.70) | 57 (30,84)              | 57 (30,84)    |
| Nigeria     | Lower middle income | 65+ threshold    | 0.38                  | 0.58 (0.47,0.70)    | 0.58 (0.47,0.70) | 56 (29,82)              | 56 (29,82)    |
| Nigeria     | Lower middle income | Full sharing     | 0.40                  | 0.58 (0.46,0.69)    | 0.29 (0.22,0.37) | 49 (26,72)              | 23 (14,31)    |
| Nicaragua   | Lower middle income | Default          | 0.05                  | 0.80 (0.76,0.83)    | 0.80 (0.76,0.83) | 281 (227,353)           | 281 (227,353) |
| Nicaragua   | Lower middle income | 2 dose threshold | 0.16                  | 0.80 (0.76,0.83)    | 0.80 (0.76,0.83) | 281 (227,353)           | 281 (227,353) |
| Nicaragua   | Lower middle income | 40+ threshold    | 0.33                  | 0.80 (0.76,0.83)    | 0.80 (0.76,0.83) | 270 (219,338)           | 270 (219,340) |
| Nicaragua   | Lower middle income | 65+ threshold    | 0.45                  | 0.77 (0.73,0.80)    | 0.69 (0.58,0.76) | 220 (176,275)           | 211 (161,265) |
| Nicaragua   | Lower middle income | Full sharing     | 0.47                  | 0.74 (0.68,0.78)    | 0.35 (0.32,0.38) | 183 (148,229)           | 95 (79,114)   |
| Netherlands | High income         | Default          | 0.92                  | 0.59 (0.44,0.66)    | 0.59 (0.44,0.66) | 451 (288,644)           | 451 (288,644) |
| Netherlands | High income         | 2 dose threshold | 0.94                  | 0.59 (0.44,0.66)    | 0.59 (0.44,0.66) | 451 (288,644)           | 451 (288,644) |
| Netherlands | High income         | 40+ threshold    | 0.72                  | 0.59 (0.44,0.65)    | 0.59 (0.44,0.66) | 449 (287,641)           | 449 (287,642) |
| Netherlands | High income         | 65+ threshold    | 0.58                  | 0.59 (0.44,0.65)    | 0.49 (0.32,0.68) | 442 (290,624)           | 420 (269,633) |
| Netherlands | High income         | Full sharing     | 0.53                  | 0.60 (0.44,0.68)    | 0.17 (0.14,0.20) | 511 (325,739)           | 171 (126,212) |
| Norway      | High income         | Default          | 0.77                  | 0.64 (0.41,0.77)    | 0.64 (0.41,0.77) | 15 (11,27)              | 15 (11,27)    |
| Norway      | High income         | 2 dose threshold | 0.83                  | 0.64 (0.41,0.77)    | 0.64 (0.41,0.77) | 15 (11,27)              | 15 (11,27)    |
| Norway      | High income         | 40+ threshold    | 0.66                  | 0.63 (0.40,0.77)    | 0.63 (0.41,0.77) | 15 (11,27)              | 15 (11,27)    |
| Norway      | High income         | 65+ threshold    | 0.57                  | 0.64 (0.44,0.76)    | 0.59 (0.33,0.75) | 15 (11,26)              | 15 (10,25)    |
| Norway      | High income         | Full sharing     | 0.52                  | 0.66 (0.47,0.78)    | 0.24 (0.12,0.39) | 18 (11,33)              | 9 (9,10)      |
| Nepal       | Lower middle income | Default          | 0.13                  | 0.93 (0.88,0.96)    | 0.93 (0.88,0.96) | 234 (143,336)           | 234 (143,336) |

| Country     | Income bracket      | Strategy         | Proportion vaccinated | Proportion infected |                  | Mortalities per 100,000 |                |
|-------------|---------------------|------------------|-----------------------|---------------------|------------------|-------------------------|----------------|
|             |                     |                  |                       | unchanged           | adapted          | unchanged               | adapted        |
| Nepal       | Lower middle income | 2 dose threshold | 0.24                  | 0.93 (0.88,0.96)    | 0.93 (0.88,0.96) | 234 (143,335)           | 234 (143,335)  |
| Nepal       | Lower middle income | 40+ threshold    | 0.39                  | 0.93 (0.88,0.96)    | 0.93 (0.88,0.96) | 233 (142,333)           | 233 (142,334)  |
| Nepal       | Lower middle income | 65+ threshold    | 0.48                  | 0.94 (0.88,0.97)    | 0.58 (0.49,0.69) | 243 (151,350)           | 180 (113,252)  |
| Nepal       | Lower middle income | Full sharing     | 0.48                  | 0.93 (0.88,0.97)    | 0.32 (0.28,0.36) | 231 (143,333)           | 91 (62,117)    |
| New Zealand | High income         | Default          | 0.21                  | 0.01 (0.01,0.01)    | 0.01 (0.01,0.01) | 5 (4,6)                 | 5 (4,6)        |
| New Zealand | High income         | 2 dose threshold | 0.32                  | 0.01 (0.01,0.01)    | 0.01 (0.01,0.01) | 5 (4,6)                 | 5 (4,6)        |
| New Zealand | High income         | 40+ threshold    | 0.49                  | 0.01 (0.01,0.01)    | 0.01 (0.01,0.01) | 5 (4,5)                 | 5 (4,5)        |
| New Zealand | High income         | 65+ threshold    | 0.51                  | 0.01 (0.01,0.01)    | 0.01 (0.00,0.01) | 4 (3,4)                 | 4 (3,4)        |
| New Zealand | High income         | Full sharing     | 0.51                  | 0.01 (0.01,0.01)    | 0.02 (0.01,0.04) | 3 (3,4)                 | 11 (4,18)      |
| Oman        | High income         | Default          | 0.30                  | 0.77 (0.66,0.83)    | 0.77 (0.66,0.83) | 203 (125,296)           | 203 (125,296)  |
| Oman        | High income         | 2 dose threshold | 0.40                  | 0.77 (0.66,0.83)    | 0.77 (0.66,0.83) | 203 (125,295)           | 203 (125,295)  |
| Oman        | High income         | 40+ threshold    | 0.39                  | 0.77 (0.65,0.82)    | 0.77 (0.65,0.82) | 200 (123,292)           | 200 (123,292)  |
| Oman        | High income         | 65+ threshold    | 0.49                  | 0.76 (0.63,0.82)    | 0.48 (0.38,0.58) | 187 (117,278)           | 126 (82,182)   |
| Oman        | High income         | Full sharing     | 0.51                  | 0.72 (0.57,0.80)    | 0.23 (0.20,0.26) | 155 (97,228)            | 64 (45,83)     |
| Pakistan    | Lower middle income | Default          | 0.08                  | 0.86 (0.83,0.89)    | 0.86 (0.83,0.89) | 142 (95,207)            | 142 (95,207)   |
| Pakistan    | Lower middle income | 2 dose threshold | 0.19                  | 0.86 (0.83,0.89)    | 0.86 (0.83,0.89) | 142 (95,207)            | 142 (95,207)   |
| Pakistan    | Lower middle income | 40+ threshold    | 0.33                  | 0.86 (0.82,0.89)    | 0.86 (0.82,0.89) | 140 (94,202)            | 141 (94,202)   |
| Pakistan    | Lower middle income | 65+ threshold    | 0.42                  | 0.85 (0.80,0.89)    | 0.84 (0.78,0.89) | 131 (89,180)            | 131 (89,179)   |
| Pakistan    | Lower middle income | Full sharing     | 0.45                  | 0.84 (0.78,0.88)    | 0.48 (0.41,0.55) | 112 (78,153)            | 81 (61,103)    |
| Panama      | High income         | Default          | 0.94                  | 0.67 (0.62,0.71)    | 0.67 (0.62,0.71) | 250 (178,387)           | 250 (178,387)  |
| Panama      | High income         | 2 dose threshold | 0.89                  | 0.67 (0.62,0.71)    | 0.67 (0.62,0.71) | 250 (178,387)           | 250 (178,387)  |
| Panama      | High income         | 40+ threshold    | 0.54                  | 0.67 (0.62,0.71)    | 0.67 (0.63,0.71) | 249 (177,387)           | 249 (177,387)  |
| Panama      | High income         | 65+ threshold    | 0.50                  | 0.68 (0.63,0.72)    | 0.63 (0.57,0.70) | 247 (176,383)           | 244 (173,378)  |
| Panama      | High income         | Full sharing     | 0.49                  | 0.68 (0.63,0.73)    | 0.41 (0.36,0.46) | 229 (166,350)           | 139 (113,175)  |
| Peru        | Upper middle income | Default          | 0.21                  | 0.82 (0.79,0.86)    | 0.82 (0.79,0.86) | 999 (607,1547)          | 999 (607,1547) |
| Peru        | Upper middle income | 2 dose threshold | 0.31                  | 0.82 (0.79,0.86)    | 0.82 (0.79,0.86) | 999 (607,1547)          | 999 (607,1547) |
| Peru        | Upper middle income | 40+ threshold    | 0.44                  | 0.82 (0.79,0.86)    | 0.82 (0.79,0.86) | 990 (600,1527)          | 991 (600,1528) |
| Peru        | Upper middle income | 65+ threshold    | 0.49                  | 0.81 (0.76,0.84)    | 0.78 (0.71,0.84) | 938 (564,1408)          | 929 (559,1378) |
| Peru        | Upper middle income | Full sharing     | 0.49                  | 0.80 (0.75,0.84)    | 0.47 (0.40,0.54) | 817 (502,1210)          | 410 (332,484)  |
| Philippines | Lower middle income | Default          | 0.11                  | 0.71 (0.55,0.80)    | 0.71 (0.55,0.80) | 193 (80,411)            | 193 (80,411)   |
| Philippines | Lower middle income | 2 dose threshold | 0.22                  | 0.71 (0.55,0.80)    | 0.71 (0.55,0.80) | 193 (80,411)            | 193 (80,411)   |
| Philippines | Lower middle income | 40+ threshold    | 0.37                  | 0.70 (0.52,0.80)    | 0.70 (0.52,0.80) | 186 (78,401)            | 186 (78,401)   |
| Philippines | Lower middle income | 65+ threshold    | 0.45                  | 0.67 (0.43,0.80)    | 0.64 (0.35,0.80) | 152 (65,340)            | 150 (62,339)   |
| Philippines | Lower middle income | Full sharing     | 0.47                  | 0.64 (0.39,0.78)    | 0.12 (0.09,0.15) | 105 (47,230)            | 25 (16,33)     |
| Poland      | High income         | Default          | 0.66                  | 0.79 (0.69,0.85)    | 0.79 (0.69,0.85) | 304 (167,543)           | 304 (167,543)  |



| Country            | Income bracket      | Strategy         | Proportion vaccinated | Proportion infected |                  | Mortalities per 100,000 |                   |
|--------------------|---------------------|------------------|-----------------------|---------------------|------------------|-------------------------|-------------------|
|                    |                     |                  |                       | unchanged           | adapted          | unchanged               | adapted           |
| Poland             | High income         | 2 dose threshold | 0.72                  | 0.79 (0.69,0.85)    | 0.79 (0.69,0.85) | 304 (167,543)           | 304 (167,543)     |
| Poland             | High income         | 40+ threshold    | 0.70                  | 0.79 (0.69,0.85)    | 0.79 (0.69,0.85) | 304 (167,542)           | 304 (167,542)     |
| Poland             | High income         | 65+ threshold    | 0.58                  | 0.78 (0.68,0.85)    | 0.78 (0.66,0.85) | 302 (167,536)           | 301 (167,536)     |
| Poland             | High income         | Full sharing     | 0.53                  | 0.78 (0.67,0.85)    | 0.29 (0.22,0.34) | 322 (174,580)           | 178 (119,254)     |
| Puerto Rico        | High income         | Default          | 0.00                  | 0.51 (0.38,0.59)    | 0.51 (0.38,0.59) | 442 (207,949)           | 442 (207,949)     |
| Puerto Rico        | High income         | 2 dose threshold | 0.13                  | 0.51 (0.38,0.59)    | 0.51 (0.38,0.59) | 441 (207,948)           | 441 (207,948)     |
| Puerto Rico        | High income         | 40+ threshold    | 0.32                  | 0.51 (0.37,0.59)    | 0.51 (0.37,0.59) | 428 (193,929)           | 428 (193,931)     |
| Puerto Rico        | High income         | 65+ threshold    | 0.50                  | 0.48 (0.33,0.58)    | 0.46 (0.30,0.58) | 355 (153,769)           | 350 (148,762)     |
| Puerto Rico        | High income         | Full sharing     | 0.54                  | 0.45 (0.30,0.57)    | 0.17 (0.14,0.21) | 298 (135,617)           | 115 (78,171)      |
| Portugal           | High income         | Default          | 0.81                  | 0.46 (0.40,0.56)    | 0.46 (0.40,0.56) | 817 (-7293,5157)        | 817 (-7293,5157)  |
| Portugal           | High income         | 2 dose threshold | 0.86                  | 0.43 (0.36,0.49)    | 0.43 (0.36,0.49) | 1181 (-4464,5157)       | 1181 (-4464,5157) |
| Portugal           | High income         | 40+ threshold    | 0.75                  | 0.43 (0.36,0.49)    | 0.43 (0.36,0.49) | 1180 (-4460,5151)       | 1180 (-4462,5147) |
| Portugal           | High income         | 65+ threshold    | 0.61                  | 0.46 (0.37,0.51)    | 0.42 (0.34,0.48) | 1183 (-4471,5180)       | 1170 (-4412,5085) |
| Portugal           | High income         | Full sharing     | 0.54                  | 0.48 (0.39,0.54)    | 0.14 (0.12,0.16) | 1306 (-5033,5787)       | 195 (-88,434)     |
| Paraguay           | Upper middle income | Default          | 0.16                  | 0.88 (0.83,0.92)    | 0.88 (0.83,0.92) | 306 (198,500)           | 306 (198,500)     |
| Paraguay           | Upper middle income | 2 dose threshold | 0.26                  | 0.88 (0.83,0.92)    | 0.88 (0.83,0.92) | 306 (197,500)           | 306 (197,500)     |
| Paraguay           | Upper middle income | 40+ threshold    | 0.39                  | 0.88 (0.83,0.92)    | 0.88 (0.83,0.92) | 301 (194,492)           | 301 (194,492)     |
| Paraguay           | Upper middle income | 65+ threshold    | 0.46                  | 0.88 (0.82,0.91)    | 0.88 (0.81,0.91) | 259 (165,426)           | 258 (165,425)     |
| Paraguay           | Upper middle income | Full sharing     | 0.48                  | 0.86 (0.79,0.90)    | 0.24 (0.20,0.27) | 192 (125,310)           | 51 (41,63)        |
| Palestine          | Lower middle income | Default          | 0.15                  | 0.83 (0.79,0.87)    | 0.83 (0.79,0.87) | 218 (109,418)           | 218 (109,418)     |
| Palestine          | Lower middle income | 2 dose threshold | 0.24                  | 0.83 (0.79,0.87)    | 0.83 (0.79,0.87) | 218 (109,418)           | 218 (109,418)     |
| Palestine          | Lower middle income | 40+ threshold    | 0.35                  | 0.82 (0.78,0.87)    | 0.82 (0.78,0.87) | 214 (107,406)           | 214 (107,406)     |
| Palestine          | Lower middle income | 65+ threshold    | 0.41                  | 0.81 (0.76,0.87)    | 0.80 (0.73,0.86) | 197 (99,384)            | 196 (97,382)      |
| Palestine          | Lower middle income | Full sharing     | 0.43                  | 0.80 (0.73,0.86)    | 0.46 (0.40,0.50) | 151 (81,285)            | 73 (51,105)       |
| Qatar              | High income         | Default          | 0.94                  | 0.77 (0.68,0.83)    | 0.77 (0.68,0.83) | 13 (21,76)              | 13 (21,76)        |
| Qatar              | High income         | 2 dose threshold | 0.96                  | 0.77 (0.68,0.83)    | 0.77 (0.68,0.83) | 24 (21,76)              | 24 (21,76)        |
| Qatar              | High income         | 40+ threshold    | 0.52                  | 0.79 (0.72,0.84)    | 0.76 (0.67,0.84) | 25 (21,80)              | 24 (21,75)        |
| Qatar              | High income         | 65+ threshold    | 0.54                  | 0.83 (0.78,0.87)    | 0.72 (0.62,0.81) | 25 (23,91)              | 25 (21,74)        |
| Qatar              | High income         | Full sharing     | 0.56                  | 0.82 (0.76,0.86)    | 0.43 (0.35,0.49) | 24 (21,81)              | 17 (13,28)        |
| Romania            | High income         | Default          | 0.34                  | 0.78 (0.73,0.83)    | 0.78 (0.73,0.83) | 297 (169,461)           | 297 (169,461)     |
| Romania            | High income         | 2 dose threshold | 0.44                  | 0.78 (0.73,0.83)    | 0.78 (0.73,0.83) | 297 (169,461)           | 297 (169,461)     |
| Romania            | High income         | 40+ threshold    | 0.59                  | 0.78 (0.72,0.82)    | 0.78 (0.72,0.82) | 297 (169,460)           | 297 (169,460)     |
| Romania            | High income         | 65+ threshold    | 0.58                  | 0.78 (0.73,0.82)    | 0.73 (0.62,0.81) | 295 (168,455)           | 291 (168,448)     |
| Romania            | High income         | Full sharing     | 0.53                  | 0.79 (0.73,0.84)    | 0.38 (0.31,0.47) | 324 (180,511)           | 193 (131,251)     |
| Russian Federation | Upper middle income | Default          | 0.23                  | 0.83 (0.74,0.89)    | 0.83 (0.74,0.89) | 879 (-1072,2849)        | 879 (-1072,2849)  |

| Country            | Income bracket      | Strategy         | Proportion vaccinated | Proportion infected |                  | Mortalities per 100,000 |                 |
|--------------------|---------------------|------------------|-----------------------|---------------------|------------------|-------------------------|-----------------|
|                    |                     |                  |                       | unchanged           | adapted          | unchanged               | adapted         |
| Russian Federation | Upper middle income | 2 dose threshold | 0.34                  | 0.82 (0.72,0.89)    | 0.82 (0.72,0.89) | 987 (-724,2848)         | 987 (-724,2848) |
| Russian Federation | Upper middle income | 40+ threshold    | 0.51                  | 0.82 (0.72,0.89)    | 0.82 (0.72,0.89) | 976 (-714,2812)         | 976 (-715,2813) |
| Russian Federation | Upper middle income | 65+ threshold    | 0.53                  | 0.81 (0.70,0.89)    | 0.70 (0.57,0.81) | 925 (-669,2660)         | 838 (-612,2418) |
| Russian Federation | Upper middle income | Full sharing     | 0.52                  | 0.81 (0.70,0.88)    | 0.38 (0.21,0.49) | 925 (-668,2662)         | 246 (48,494)    |
| Rwanda             | Low income          | Default          | 0.04                  | 0.79 (0.57,0.88)    | 0.79 (0.57,0.88) | 47 (23,85)              | 47 (23,85)      |
| Rwanda             | Low income          | 2 dose threshold | 0.14                  | 0.79 (0.57,0.88)    | 0.79 (0.57,0.88) | 47 (23,85)              | 47 (23,85)      |
| Rwanda             | Low income          | 40+ threshold    | 0.30                  | 0.79 (0.56,0.88)    | 0.79 (0.57,0.88) | 46 (22,84)              | 46 (22,84)      |
| Rwanda             | Low income          | 65+ threshold    | 0.41                  | 0.78 (0.53,0.87)    | 0.29 (0.19,0.39) | 43 (20,82)              | 25 (14,44)      |
| Rwanda             | Low income          | Full sharing     | 0.42                  | 0.73 (0.44,0.85)    | 0.07 (0.05,0.10) | 34 (17,64)              | 7 (5,9)         |
| Saudi Arabia       | High income         | Default          | 0.71                  | 0.61 (0.45,0.69)    | 0.61 (0.45,0.69) | 899 (111,733)           | 899 (111,733)   |
| Saudi Arabia       | High income         | 2 dose threshold | 0.81                  | 0.61 (0.44,0.69)    | 0.61 (0.44,0.69) | 898 (111,732)           | 898 (111,732)   |
| Saudi Arabia       | High income         | 40+ threshold    | 0.63                  | 0.61 (0.44,0.69)    | 0.61 (0.44,0.69) | 842 (106,691)           | 842 (106,691)   |
| Saudi Arabia       | High income         | 65+ threshold    | 0.47                  | 0.56 (0.38,0.65)    | 0.44 (0.31,0.60) | 597 (79,508)            | 506 (70,447)    |
| Saudi Arabia       | High income         | Full sharing     | 0.50                  | 0.51 (0.34,0.62)    | 0.23 (0.18,0.28) | 439 (69,382)            | 87 (42,96)      |
| Sudan              | Low income          | Default          | 0.02                  | 0.65 (0.50,0.74)    | 0.65 (0.50,0.74) | 96 (46,198)             | 96 (46,198)     |
| Sudan              | Low income          | 2 dose threshold | 0.12                  | 0.65 (0.50,0.74)    | 0.65 (0.50,0.74) | 96 (46,198)             | 96 (46,198)     |
| Sudan              | Low income          | 40+ threshold    | 0.28                  | 0.64 (0.49,0.74)    | 0.64 (0.49,0.74) | 93 (44,191)             | 93 (44,192)     |
| Sudan              | Low income          | 65+ threshold    | 0.40                  | 0.61 (0.43,0.73)    | 0.58 (0.38,0.73) | 80 (38,154)             | 78 (38,143)     |
| Sudan              | Low income          | Full sharing     | 0.42                  | 0.57 (0.39,0.72)    | 0.32 (0.20,0.43) | 66 (34,121)             | 43 (28,59)      |
| Senegal            | Lower middle income | Default          | 0.04                  | 0.84 (0.77,0.89)    | 0.84 (0.77,0.89) | 75 (48,107)             | 75 (48,107)     |
| Senegal            | Lower middle income | 2 dose threshold | 0.14                  | 0.84 (0.77,0.89)    | 0.84 (0.77,0.89) | 75 (48,107)             | 75 (48,107)     |
| Senegal            | Lower middle income | 40+ threshold    | 0.29                  | 0.83 (0.76,0.88)    | 0.83 (0.76,0.88) | 74 (47,105)             | 74 (47,105)     |
| Senegal            | Lower middle income | 65+ threshold    | 0.39                  | 0.78 (0.72,0.84)    | 0.62 (0.55,0.68) | 70 (44,100)             | 67 (42,97)      |
| Senegal            | Lower middle income | Full sharing     | 0.41                  | 0.75 (0.69,0.80)    | 0.24 (0.21,0.28) | 61 (39,87)              | 32 (23,41)      |
| Singapore          | High income         | Default          | 0.89                  | 0.49 (0.24,0.66)    | 0.49 (0.24,0.66) | 1 (2,4)                 | 1 (2,4)         |
| Singapore          | High income         | 2 dose threshold | 0.93                  | 0.47 (0.15,0.65)    | 0.47 (0.15,0.65) | 3 (2,4)                 | 3 (2,4)         |
| Singapore          | High income         | 40+ threshold    | 0.72                  | 0.53 (0.20,0.69)    | 0.09 (0.07,0.14) | 3 (2,5)                 | 2 (1,3)         |
| Singapore          | High income         | 65+ threshold    | 0.57                  | 0.73 (0.57,0.81)    | 0.08 (0.06,0.12) | 5 (3,10)                | 2 (1,3)         |
| Singapore          | High income         | Full sharing     | 0.55                  | 0.74 (0.59,0.82)    | 0.05 (0.04,0.07) | 5 (3,11)                | 1 (1,2)         |
| Sierra Leone       | Low income          | Default          | 0.02                  | 0.54 (0.39,0.63)    | 0.54 (0.39,0.63) | 53 (34,83)              | 53 (34,83)      |
| Sierra Leone       | Low income          | 2 dose threshold | 0.12                  | 0.54 (0.39,0.63)    | 0.54 (0.39,0.63) | 53 (34,83)              | 53 (34,83)      |
| Sierra Leone       | Low income          | 40+ threshold    | 0.28                  | 0.53 (0.38,0.62)    | 0.53 (0.38,0.62) | 50 (31,78)              | 50 (31,78)      |
| Sierra Leone       | Low income          | 65+ threshold    | 0.40                  | 0.46 (0.32,0.56)    | 0.33 (0.25,0.43) | 39 (25,55)              | 36 (25,51)      |
| Sierra Leone       | Low income          | Full sharing     | 0.42                  | 0.39 (0.27,0.49)    | 0.18 (0.14,0.23) | 34 (23,47)              | 22 (16,27)      |
| El Salvador        | Lower middle income | Default          | 0.40                  | 0.66 (0.52,0.73)    | 0.66 (0.52,0.73) | 303 (208,501)           | 303 (208,501)   |

| Country               | Income bracket      | Strategy         | Proportion vaccinated | Proportion infected |                  | Mortalities per 100,000 |                    |
|-----------------------|---------------------|------------------|-----------------------|---------------------|------------------|-------------------------|--------------------|
|                       |                     |                  |                       | unchanged           | adapted          | unchanged               | adapted            |
| El Salvador           | Lower middle income | 2 dose threshold | 0.48                  | 0.66 (0.52,0.73)    | 0.66 (0.52,0.73) | 303 (208,500)           | 303 (208,500)      |
| El Salvador           | Lower middle income | 40+ threshold    | 0.49                  | 0.65 (0.51,0.73)    | 0.66 (0.51,0.73) | 299 (206,491)           | 299 (206,492)      |
| El Salvador           | Lower middle income | 65+ threshold    | 0.48                  | 0.64 (0.50,0.72)    | 0.46 (0.32,0.56) | 269 (192,417)           | 242 (172,370)      |
| El Salvador           | Lower middle income | Full sharing     | 0.49                  | 0.61 (0.45,0.69)    | 0.17 (0.15,0.20) | 231 (165,354)           | 83 (61,117)        |
| Serbia                | Upper middle income | Default          | 0.45                  | 0.77 (0.72,0.80)    | 0.77 (0.72,0.80) | 194 (118,303)           | 194 (118,303)      |
| Serbia                | Upper middle income | 2 dose threshold | 0.53                  | 0.77 (0.72,0.80)    | 0.77 (0.72,0.80) | 194 (118,303)           | 194 (118,303)      |
| Serbia                | Upper middle income | 40+ threshold    | 0.65                  | 0.76 (0.71,0.80)    | 0.76 (0.71,0.80) | 194 (118,302)           | 194 (118,302)      |
| Serbia                | Upper middle income | 65+ threshold    | 0.59                  | 0.77 (0.73,0.81)    | 0.65 (0.56,0.73) | 196 (120,309)           | 186 (115,286)      |
| Serbia                | Upper middle income | Full sharing     | 0.53                  | 0.79 (0.74,0.82)    | 0.31 (0.25,0.35) | 225 (133,361)           | 110 (80,137)       |
| South Sudan           | Low income          | Default          | 0.01                  | 0.49 (0.37,0.62)    | 0.49 (0.37,0.62) | 61 (33,94)              | 61 (33,94)         |
| South Sudan           | Low income          | 2 dose threshold | 0.11                  | 0.49 (0.37,0.62)    | 0.49 (0.37,0.62) | 61 (32,94)              | 61 (32,94)         |
| South Sudan           | Low income          | 40+ threshold    | 0.26                  | 0.49 (0.37,0.62)    | 0.49 (0.37,0.62) | 60 (32,93)              | 60 (32,93)         |
| South Sudan           | Low income          | 65+ threshold    | 0.39                  | 0.49 (0.36,0.61)    | 0.49 (0.36,0.61) | 59 (32,91)              | 59 (32,91)         |
| South Sudan           | Low income          | Full sharing     | 0.41                  | 0.48 (0.35,0.61)    | 0.16 (0.11,0.22) | 52 (28,80)              | 22 (15,28)         |
| Sao Tome and Principe | Lower middle income | Default          | 0.15                  | 0.73 (0.68,0.77)    | 0.73 (0.68,0.77) | 80 (45,136)             | 80 (45,136)        |
| Sao Tome and Principe | Lower middle income | 2 dose threshold | 0.24                  | 0.73 (0.67,0.77)    | 0.73 (0.67,0.77) | 80 (45,136)             | 80 (45,136)        |
| Sao Tome and Principe | Lower middle income | 40+ threshold    | 0.32                  | 0.72 (0.66,0.76)    | 0.71 (0.66,0.76) | 78 (44,134)             | 78 (44,134)        |
| Sao Tome and Principe | Lower middle income | 65+ threshold    | 0.40                  | 0.70 (0.63,0.75)    | 0.66 (0.58,0.72) | 74 (42,127)             | 73 (42,125)        |
| Sao Tome and Principe | Lower middle income | Full sharing     | 0.41                  | 0.68 (0.62,0.74)    | 0.44 (0.37,0.51) | 63 (37,105)             | 39 (26,60)         |
| Suriname              | Upper middle income | Default          | 0.41                  | 0.79 (0.68,0.85)    | 0.79 (0.68,0.85) | 233 (110,456)           | 233 (110,456)      |
| Suriname              | Upper middle income | 2 dose threshold | 0.49                  | 0.79 (0.68,0.85)    | 0.79 (0.68,0.85) | 233 (110,456)           | 233 (110,456)      |
| Suriname              | Upper middle income | 40+ threshold    | 0.48                  | 0.78 (0.67,0.84)    | 0.78 (0.67,0.84) | 228 (107,447)           | 228 (107,447)      |
| Suriname              | Upper middle income | 65+ threshold    | 0.48                  | 0.77 (0.66,0.83)    | 0.71 (0.41,0.84) | 196 (96,378)            | 191 (88,384)       |
| Suriname              | Upper middle income | Full sharing     | 0.49                  | 0.76 (0.65,0.82)    | 0.27 (0.21,0.33) | 160 (79,295)            | 70 (38,128)        |
| Slovakia              | High income         | Default          | 0.55                  | 0.54 (0.44,0.61)    | 0.54 (0.44,0.61) | -2506 (-5721,2872)      | -2506 (-5721,2872) |
| Slovakia              | High income         | 2 dose threshold | 0.62                  | 0.50 (0.37,0.58)    | 0.50 (0.37,0.58) | -960 (-2887,2866)       | -960 (-2887,2866)  |
| Slovakia              | High income         | 40+ threshold    | 0.67                  | 0.49 (0.37,0.58)    | 0.49 (0.37,0.58) | -955 (-2874,2853)       | -957 (-2878,2858)  |
| Slovakia              | High income         | 65+ threshold    | 0.57                  | 0.51 (0.38,0.58)    | 0.41 (0.30,0.53) | -981 (-2939,2928)       | -891 (-2621,2666)  |
| Slovakia              | High income         | Full sharing     | 0.53                  | 0.52 (0.39,0.60)    | 0.13 (0.11,0.15) | -1209 (-3657,3579)      | -28 (-140,261)     |
| Slovenia              | High income         | Default          | 0.58                  | 0.69 (0.61,0.75)    | 0.69 (0.61,0.75) | 388 (229,637)           | 388 (229,637)      |
| Slovenia              | High income         | 2 dose threshold | 0.65                  | 0.69 (0.61,0.75)    | 0.69 (0.61,0.75) | 388 (229,637)           | 388 (229,637)      |
| Slovenia              | High income         | 40+ threshold    | 0.71                  | 0.69 (0.61,0.75)    | 0.69 (0.61,0.75) | 387 (229,635)           | 387 (229,635)      |
| Slovenia              | High income         | 65+ threshold    | 0.58                  | 0.70 (0.61,0.75)    | 0.64 (0.53,0.74) | 385 (228,631)           | 377 (225,613)      |
| Slovenia              | High income         | Full sharing     | 0.53                  | 0.71 (0.62,0.76)    | 0.37 (0.25,0.46) | 435 (245,737)           | 232 (177,299)      |
| Sweden                | High income         | Default          | 0.77                  | 0.59 (0.43,0.68)    | 0.59 (0.43,0.68) | 488 (263,921)           | 488 (263,921)      |

| Country             | Income bracket      | Strategy         | Proportion vaccinated | Proportion infected |                  | Mortalities per 100,000 |               |
|---------------------|---------------------|------------------|-----------------------|---------------------|------------------|-------------------------|---------------|
|                     |                     |                  |                       | unchanged           | adapted          | unchanged               | adapted       |
| Sweden              | High income         | 2 dose threshold | 0.81                  | 0.59 (0.43,0.68)    | 0.59 (0.43,0.68) | 488 (263,921)           | 488 (263,921) |
| Sweden              | High income         | 40+ threshold    | 0.70                  | 0.59 (0.43,0.68)    | 0.59 (0.43,0.68) | 486 (262,918)           | 487 (263,919) |
| Sweden              | High income         | 65+ threshold    | 0.58                  | 0.59 (0.43,0.68)    | 0.54 (0.36,0.68) | 475 (261,904)           | 463 (252,865) |
| Sweden              | High income         | Full sharing     | 0.52                  | 0.61 (0.45,0.70)    | 0.19 (0.15,0.23) | 588 (306,1124)          | 177 (130,252) |
| Eswatini            | Lower middle income | Default          | 0.04                  | 0.89 (0.85,0.93)    | 0.89 (0.85,0.93) | 288 (184,401)           | 288 (184,401) |
| Eswatini            | Lower middle income | 2 dose threshold | 0.15                  | 0.89 (0.85,0.93)    | 0.89 (0.85,0.93) | 288 (184,401)           | 288 (184,401) |
| Eswatini            | Lower middle income | 40+ threshold    | 0.31                  | 0.88 (0.84,0.92)    | 0.88 (0.84,0.92) | 279 (178,389)           | 279 (178,389) |
| Eswatini            | Lower middle income | 65+ threshold    | 0.42                  | 0.86 (0.81,0.90)    | 0.71 (0.65,0.76) | 259 (164,358)           | 246 (153,340) |
| Eswatini            | Lower middle income | Full sharing     | 0.44                  | 0.83 (0.79,0.88)    | 0.49 (0.42,0.55) | 224 (144,309)           | 137 (96,180)  |
| Syria               | Low income          | Default          | 0.01                  | 0.51 (0.26,0.68)    | 0.51 (0.26,0.68) | 232 (90,547)            | 232 (90,547)  |
| Syria               | Low income          | 2 dose threshold | 0.12                  | 0.51 (0.25,0.68)    | 0.51 (0.25,0.68) | 229 (90,546)            | 229 (90,546)  |
| Syria               | Low income          | 40+ threshold    | 0.30                  | 0.48 (0.21,0.68)    | 0.48 (0.21,0.68) | 211 (73,523)            | 212 (73,524)  |
| Syria               | Low income          | 65+ threshold    | 0.44                  | 0.44 (0.16,0.67)    | 0.44 (0.15,0.67) | 157 (52,397)            | 156 (49,393)  |
| Syria               | Low income          | Full sharing     | 0.47                  | 0.39 (0.14,0.64)    | 0.07 (0.05,0.09) | 97 (38,218)             | 24 (16,33)    |
| Chad                | Low income          | Default          | 0.00                  | 0.48 (0.38,0.57)    | 0.48 (0.38,0.57) | 71 (43,109)             | 71 (43,109)   |
| Chad                | Low income          | 2 dose threshold | 0.10                  | 0.47 (0.38,0.57)    | 0.47 (0.38,0.57) | 71 (42,109)             | 71 (42,109)   |
| Chad                | Low income          | 40+ threshold    | 0.24                  | 0.47 (0.37,0.57)    | 0.47 (0.37,0.57) | 69 (40,108)             | 69 (40,108)   |
| Chad                | Low income          | 65+ threshold    | 0.36                  | 0.45 (0.36,0.56)    | 0.45 (0.34,0.56) | 65 (38,98)              | 65 (38,96)    |
| Chad                | Low income          | Full sharing     | 0.38                  | 0.44 (0.34,0.55)    | 0.20 (0.14,0.27) | 55 (33,83)              | 26 (19,33)    |
| Togo                | Low income          | Default          | 0.05                  | 0.61 (0.52,0.68)    | 0.61 (0.52,0.68) | 78 (51,140)             | 78 (51,140)   |
| Togo                | Low income          | 2 dose threshold | 0.15                  | 0.61 (0.52,0.68)    | 0.61 (0.52,0.68) | 78 (51,140)             | 78 (51,140)   |
| Togo                | Low income          | 40+ threshold    | 0.30                  | 0.61 (0.51,0.67)    | 0.61 (0.51,0.67) | 75 (48,137)             | 75 (48,137)   |
| Togo                | Low income          | 65+ threshold    | 0.40                  | 0.57 (0.41,0.67)    | 0.52 (0.31,0.67) | 63 (40,119)             | 62 (37,119)   |
| Togo                | Low income          | Full sharing     | 0.42                  | 0.51 (0.34,0.64)    | 0.10 (0.08,0.12) | 47 (31,80)              | 15 (12,20)    |
| Thailand            | Upper middle income | Default          | 0.15                  | 0.55 (0.36,0.89)    | 0.55 (0.36,0.89) | 15 (26,353)             | 15 (26,353)   |
| Thailand            | Upper middle income | 2 dose threshold | 0.27                  | 0.55 (0.36,0.89)    | 0.55 (0.36,0.89) | 17 (26,353)             | 17 (26,353)   |
| Thailand            | Upper middle income | 40+ threshold    | 0.46                  | 0.55 (0.35,0.89)    | 0.55 (0.35,0.89) | 15 (23,329)             | 15 (23,331)   |
| Thailand            | Upper middle income | 65+ threshold    | 0.51                  | 0.51 (0.28,0.89)    | 0.49 (0.10,0.88) | 4 (12,252)              | 4 (7,258)     |
| Thailand            | Upper middle income | Full sharing     | 0.53                  | 0.46 (0.20,0.86)    | 0.00 (0.00,0.00) | 2 (7,167)               | 0 (0,1)       |
| Tajikistan          | Low income          | Default          | 0.04                  | 0.82 (0.79,0.86)    | 0.82 (0.79,0.86) | 93 (59,141)             | 93 (59,141)   |
| Tajikistan          | Low income          | 2 dose threshold | 0.15                  | 0.82 (0.79,0.86)    | 0.82 (0.79,0.86) | 93 (59,141)             | 93 (59,141)   |
| Tajikistan          | Low income          | 40+ threshold    | 0.29                  | 0.82 (0.78,0.86)    | 0.82 (0.78,0.86) | 89 (57,135)             | 89 (57,136)   |
| Tajikistan          | Low income          | 65+ threshold    | 0.41                  | 0.80 (0.75,0.85)    | 0.77 (0.69,0.84) | 78 (47,121)             | 77 (46,121)   |
| Tajikistan          | Low income          | Full sharing     | 0.43                  | 0.78 (0.73,0.83)    | 0.43 (0.37,0.48) | 65 (41,98)              | 43 (32,56)    |
| Trinidad and Tobago | High income         | Default          | 0.22                  | 0.70 (0.50,0.89)    | 0.70 (0.50,0.89) | 307 (104,709)           | 307 (104,709) |

| Country                  | Income bracket      | Strategy         | Proportion vaccinated | Proportion infected |                  | Mortalities per 100,000 |                  |
|--------------------------|---------------------|------------------|-----------------------|---------------------|------------------|-------------------------|------------------|
|                          |                     |                  |                       | unchanged           | adapted          | unchanged               | adapted          |
| Trinidad and Tobago      | High income         | 2 dose threshold | 0.33                  | 0.70 (0.49,0.89)    | 0.70 (0.49,0.89) | 307 (104,708)           | 307 (104,708)    |
| Trinidad and Tobago      | High income         | 40+ threshold    | 0.49                  | 0.68 (0.45,0.89)    | 0.69 (0.45,0.89) | 297 (101,692)           | 298 (101,692)    |
| Trinidad and Tobago      | High income         | 65+ threshold    | 0.49                  | 0.67 (0.41,0.89)    | 0.62 (0.26,0.88) | 253 (86,601)            | 249 (79,599)     |
| Trinidad and Tobago      | High income         | Full sharing     | 0.52                  | 0.63 (0.39,0.86)    | 0.09 (0.07,0.14) | 186 (65,441)            | 30 (16,53)       |
| Tunisia                  | Lower middle income | Default          | 0.16                  | 0.87 (0.83,0.90)    | 0.87 (0.83,0.90) | 525 (-1443,2002)        | 525 (-1443,2002) |
| Tunisia                  | Lower middle income | 2 dose threshold | 0.27                  | 0.87 (0.83,0.90)    | 0.87 (0.83,0.90) | 539 (-1361,2001)        | 539 (-1361,2001) |
| Tunisia                  | Lower middle income | 40+ threshold    | 0.43                  | 0.87 (0.83,0.90)    | 0.87 (0.83,0.90) | 526 (-1327,1944)        | 527 (-1327,1949) |
| Tunisia                  | Lower middle income | 65+ threshold    | 0.47                  | 0.85 (0.81,0.89)    | 0.85 (0.79,0.89) | 434 (-1080,1546)        | 432 (-1081,1545) |
| Tunisia                  | Lower middle income | Full sharing     | 0.49                  | 0.84 (0.78,0.88)    | 0.29 (0.24,0.35) | 355 (-791,1202)         | 99 (56,157)      |
| Turkey                   | Upper middle income | Default          | 0.64                  | 0.74 (0.64,0.80)    | 0.74 (0.64,0.80) | 136 (53,340)            | 136 (53,340)     |
| Turkey                   | Upper middle income | 2 dose threshold | 0.69                  | 0.74 (0.64,0.79)    | 0.74 (0.64,0.79) | 148 (53,340)            | 148 (53,340)     |
| Turkey                   | Upper middle income | 40+ threshold    | 0.53                  | 0.73 (0.63,0.79)    | 0.73 (0.63,0.79) | 147 (53,338)            | 147 (53,339)     |
| Turkey                   | Upper middle income | 65+ threshold    | 0.51                  | 0.75 (0.64,0.80)    | 0.63 (0.47,0.74) | 155 (55,371)            | 139 (53,306)     |
| Turkey                   | Upper middle income | Full sharing     | 0.50                  | 0.76 (0.64,0.82)    | 0.32 (0.24,0.42) | 157 (57,389)            | 64 (43,95)       |
| Uganda                   | Low income          | Default          | 0.02                  | 0.89 (0.68,0.98)    | 0.89 (0.68,0.98) | 74 (39,124)             | 74 (39,124)      |
| Uganda                   | Low income          | 2 dose threshold | 0.12                  | 0.89 (0.68,0.98)    | 0.89 (0.68,0.98) | 74 (39,124)             | 74 (39,124)      |
| Uganda                   | Low income          | 40+ threshold    | 0.26                  | 0.89 (0.68,0.98)    | 0.89 (0.68,0.98) | 70 (37,117)             | 70 (37,117)      |
| Uganda                   | Low income          | 65+ threshold    | 0.37                  | 0.86 (0.61,0.97)    | 0.35 (0.24,0.50) | 44 (25,71)              | 26 (16,37)       |
| Uganda                   | Low income          | Full sharing     | 0.39                  | 0.77 (0.47,0.94)    | 0.14 (0.12,0.18) | 32 (19,49)              | 13 (10,18)       |
| Ukraine                  | Lower middle income | Default          | 0.06                  | 0.79 (0.69,0.85)    | 0.79 (0.69,0.85) | -9 (-1701,1078)         | -9 (-1701,1078)  |
| Ukraine                  | Lower middle income | 2 dose threshold | 0.19                  | 0.79 (0.69,0.85)    | 0.79 (0.69,0.85) | -1 (-1690,1078)         | -1 (-1690,1078)  |
| Ukraine                  | Lower middle income | 40+ threshold    | 0.38                  | 0.79 (0.69,0.85)    | 0.79 (0.69,0.85) | -1 (-1679,1071)         | -1 (-1679,1071)  |
| Ukraine                  | Lower middle income | 65+ threshold    | 0.51                  | 0.78 (0.67,0.85)    | 0.78 (0.66,0.85) | 6 (-1411,1007)          | 5 (-1391,1002)   |
| Ukraine                  | Lower middle income | Full sharing     | 0.53                  | 0.77 (0.66,0.84)    | 0.31 (0.22,0.38) | 23 (-1109,842)          | 75 (-2,156)      |
| Uruguay                  | High income         | Default          | 0.99                  | 0.71 (0.53,0.90)    | 0.71 (0.53,0.90) | 153 (59,339)            | 153 (59,339)     |
| Uruguay                  | High income         | 2 dose threshold | 0.90                  | 0.71 (0.53,0.90)    | 0.71 (0.53,0.90) | 153 (59,338)            | 153 (59,338)     |
| Uruguay                  | High income         | 40+ threshold    | 0.64                  | 0.71 (0.53,0.90)    | 0.71 (0.53,0.90) | 152 (59,335)            | 152 (59,336)     |
| Uruguay                  | High income         | 65+ threshold    | 0.55                  | 0.71 (0.56,0.90)    | 0.70 (0.53,0.89) | 143 (55,312)            | 141 (55,311)     |
| Uruguay                  | High income         | Full sharing     | 0.51                  | 0.71 (0.58,0.88)    | 0.05 (0.04,0.07) | 116 (51,233)            | 10 (7,13)        |
| United States of America | High income         | Default          | 0.81                  | 0.54 (0.49,0.58)    | 0.54 (0.49,0.58) | 300 (244,349)           | 300 (244,349)    |
| United States of America | High income         | 2 dose threshold | 0.84                  | 0.54 (0.49,0.58)    | 0.54 (0.49,0.58) | 300 (244,349)           | 300 (244,349)    |
| United States of America | High income         | 40+ threshold    | 0.68                  | 0.68 (0.62,0.73)    | 0.47 (0.41,0.54) | 316 (262,364)           | 294 (236,347)    |
| United States of America | High income         | 65+ threshold    | 0.57                  | 0.79 (0.75,0.82)    | 0.46 (0.41,0.53) | 341 (279,393)           | 293 (235,345)    |
| United States of America | High income         | Full sharing     | 0.52                  | 0.80 (0.77,0.84)    | 0.21 (0.20,0.22) | 423 (339,496)           | 151 (133,167)    |
| Uzbekistan               | Lower middle income | Default          | 0.11                  | 0.79 (0.73,0.83)    | 0.79 (0.73,0.83) | 201 (104,471)           | 201 (104,471)    |

| Country      | Income bracket      | Strategy         | Proportion vaccinated | Proportion infected |                  | Mortalities per 100,000 |                 |
|--------------|---------------------|------------------|-----------------------|---------------------|------------------|-------------------------|-----------------|
|              |                     |                  |                       | unchanged           | adapted          | unchanged               | adapted         |
| Uzbekistan   | Lower middle income | 2 dose threshold | 0.22                  | 0.79 (0.73,0.83)    | 0.79 (0.73,0.83) | 201 (104,470)           | 201 (104,470)   |
| Uzbekistan   | Lower middle income | 40+ threshold    | 0.37                  | 0.79 (0.73,0.83)    | 0.79 (0.72,0.83) | 195 (101,450)           | 195 (101,451)   |
| Uzbekistan   | Lower middle income | 65+ threshold    | 0.45                  | 0.77 (0.71,0.82)    | 0.73 (0.58,0.82) | 165 (88,342)            | 159 (87,305)    |
| Uzbekistan   | Lower middle income | Full sharing     | 0.48                  | 0.76 (0.67,0.81)    | 0.43 (0.29,0.54) | 138 (76,272)            | 87 (62,122)     |
| Venezuela    | Upper middle income | Default          | 0.10                  | 0.81 (0.77,0.84)    | 0.81 (0.77,0.84) | 290 (232,364)           | 290 (232,364)   |
| Venezuela    | Upper middle income | 2 dose threshold | 0.21                  | 0.81 (0.77,0.84)    | 0.81 (0.77,0.84) | 290 (232,364)           | 290 (232,364)   |
| Venezuela    | Upper middle income | 40+ threshold    | 0.38                  | 0.81 (0.77,0.84)    | 0.81 (0.77,0.84) | 283 (227,356)           | 283 (227,356)   |
| Venezuela    | Upper middle income | 65+ threshold    | 0.46                  | 0.78 (0.74,0.82)    | 0.70 (0.58,0.78) | 249 (200,313)           | 242 (194,310)   |
| Venezuela    | Upper middle income | Full sharing     | 0.48                  | 0.76 (0.70,0.81)    | 0.33 (0.29,0.37) | 223 (179,277)           | 143 (119,172)   |
| Vietnam      | Lower middle income | Default          | 0.05                  | 0.46 (0.14,0.71)    | 0.46 (0.14,0.71) | 167 (49,307)            | 167 (49,307)    |
| Vietnam      | Lower middle income | 2 dose threshold | 0.17                  | 0.46 (0.13,0.71)    | 0.46 (0.13,0.71) | 166 (48,307)            | 166 (48,307)    |
| Vietnam      | Lower middle income | 40+ threshold    | 0.36                  | 0.46 (0.13,0.71)    | 0.46 (0.13,0.71) | 147 (37,276)            | 148 (37,277)    |
| Vietnam      | Lower middle income | 65+ threshold    | 0.48                  | 0.41 (0.08,0.67)    | 0.31 (0.02,0.64) | 65 (11,124)             | 50 (4,116)      |
| Vietnam      | Lower middle income | Full sharing     | 0.50                  | 0.34 (0.04,0.63)    | 0.00 (0.00,0.00) | 38 (5,78)               | 0 (0,0)         |
| Yemen        | Low income          | Default          | 0.01                  | 0.68 (0.54,0.81)    | 0.68 (0.54,0.81) | 287 (-746,1457)         | 287 (-746,1457) |
| Yemen        | Low income          | 2 dose threshold | 0.12                  | 0.68 (0.53,0.80)    | 0.68 (0.53,0.80) | 286 (-682,1456)         | 286 (-682,1456) |
| Yemen        | Low income          | 40+ threshold    | 0.28                  | 0.67 (0.51,0.80)    | 0.67 (0.51,0.80) | 255 (-547,1419)         | 255 (-547,1421) |
| Yemen        | Low income          | 65+ threshold    | 0.40                  | 0.62 (0.44,0.80)    | 0.61 (0.41,0.80) | 217 (-416,1250)         | 217 (-413,1242) |
| Yemen        | Low income          | Full sharing     | 0.43                  | 0.59 (0.39,0.78)    | 0.22 (0.14,0.30) | 141 (-222,750)          | 38 (17,78)      |
| South Africa | Upper middle income | Default          | 0.14                  | 0.85 (0.77,0.90)    | 0.85 (0.77,0.90) | 389 (207,636)           | 389 (207,636)   |
| South Africa | Upper middle income | 2 dose threshold | 0.25                  | 0.85 (0.77,0.90)    | 0.85 (0.77,0.90) | 389 (207,636)           | 389 (207,636)   |
| South Africa | Upper middle income | 40+ threshold    | 0.39                  | 0.85 (0.77,0.89)    | 0.85 (0.77,0.89) | 376 (202,608)           | 376 (202,608)   |
| South Africa | Upper middle income | 65+ threshold    | 0.46                  | 0.82 (0.75,0.87)    | 0.67 (0.59,0.76) | 331 (180,545)           | 306 (167,498)   |
| South Africa | Upper middle income | Full sharing     | 0.48                  | 0.81 (0.73,0.86)    | 0.42 (0.35,0.48) | 283 (158,457)           | 149 (105,194)   |
| Zambia       | Lower middle income | Default          | 0.01                  | 0.87 (0.68,0.95)    | 0.87 (0.68,0.95) | 148 (62,296)            | 148 (62,296)    |
| Zambia       | Lower middle income | 2 dose threshold | 0.11                  | 0.87 (0.68,0.95)    | 0.87 (0.68,0.95) | 148 (62,295)            | 148 (62,295)    |
| Zambia       | Lower middle income | 40+ threshold    | 0.26                  | 0.87 (0.67,0.94)    | 0.87 (0.67,0.94) | 133 (56,266)            | 133 (56,266)    |
| Zambia       | Lower middle income | 65+ threshold    | 0.38                  | 0.82 (0.58,0.92)    | 0.36 (0.23,0.49) | 73 (35,134)             | 50 (28,83)      |
| Zambia       | Lower middle income | Full sharing     | 0.40                  | 0.73 (0.44,0.87)    | 0.16 (0.09,0.23) | 56 (30,95)              | 21 (15,28)      |
| Zimbabwe     | Lower middle income | Default          | 0.08                  | 0.91 (0.85,0.94)    | 0.91 (0.85,0.94) | 80 (46,114)             | 80 (46,114)     |
| Zimbabwe     | Lower middle income | 2 dose threshold | 0.17                  | 0.91 (0.85,0.94)    | 0.91 (0.85,0.94) | 80 (46,114)             | 80 (46,114)     |
| Zimbabwe     | Lower middle income | 40+ threshold    | 0.31                  | 0.90 (0.85,0.94)    | 0.90 (0.85,0.94) | 77 (44,110)             | 77 (44,110)     |
| Zimbabwe     | Lower middle income | 65+ threshold    | 0.39                  | 0.87 (0.80,0.91)    | 0.53 (0.46,0.61) | 65 (38,92)              | 56 (33,79)      |
| Zimbabwe     | Lower middle income | Full sharing     | 0.41                  | 0.82 (0.72,0.88)    | 0.22 (0.19,0.27) | 57 (34,81)              | 24 (17,31)      |
